# Supplementary material for: Synthesis, Computational Study, and In Vitro α-Glucosidase Inhibitory Action of 1,3,4-Thiadiazole Derivatives of 3-Aminopyridin-2(1H)-ones
Source: MDPI journal article supplement (doi:10.3390/ph17030377), 2024-03-15
Supplement: s1 [file s1]

## Supporting Information

### Synthesis, Computational Study and in vitro $\alpha$ -glucosidase inhibitory action of 1,3,4-thiadiazole derivatives from 3-aminopyridin-2(1*H*)-ones

Zarina Shulgau<sup>1,2\*</sup>, Irina Palamarchuk<sup>3</sup>, Shynggys Sergazy<sup>1,2</sup>, Assel Urazbayeva<sup>1,2</sup>, Yerlan Ramankulov<sup>4</sup>, Ivan Kulakov<sup>2,3\*\*</sup>

<sup>1</sup> National Laboratory Astana, Nazarbayev University, Kabanbai Batyr ave. 53, Z05H0P9 Astana, Kazakhstan

<sup>2</sup> National Center for Biotechnology, 13/5 Kurgalzhynskoe Road, Z05K8D5 Astana, Kazakhstan

<sup>3</sup> Institute of Chemistry, Tyumen State University, 15a Perekopskaya St., Tyumen 625003, Russia;  
i.v.kulakov@utmn.ru

<sup>4</sup> Nazarbayev University, Kabanbai Batyr ave. 53, Z05H0P9 Astana, Kazakhstan

\* Correspondence: zarina.shulgau@icloud.com

#### Table of Contents

|                                                                                                                                                  |    |
|--------------------------------------------------------------------------------------------------------------------------------------------------|----|
| Experimental Procedures .....                                                                                                                    | 1  |
| 1. Materials and Methods.....                                                                                                                    | 1  |
| 2.3 Synthesis of 1,3,4-thiadiazoles derivatives <b>7a-c</b> , <b>8a-c</b> , <b>9a-c</b> .....                                                    | 2  |
| 3. Author Contributions.....                                                                                                                     | 5  |
| 4. Copies of NMR Spectra of Products.....                                                                                                        | 6  |
| 5. Copies of MS Spectra of Products.....                                                                                                         | 15 |
| 6. Table S1. Complexes between synthesized derivatives <b>5(a-c)</b> , <b>7-9(a-c)</b> and active sites of proteins (PDB: 5NN8, 3W37, 2QV4)..... | 18 |
| 7. Table S2. Basic amino acid interactions and H-bonds.....                                                                                      | 29 |

#### Experimental Procedures

##### 1. Materials and Methods

<sup>1</sup>H and <sup>13</sup>C NMR spectra were recorded on a Bruker DRX400 (400 and 100 MHz, respectively) and Bruker AVANCE 500 (500 and 125 MHz, respectively) instruments using DMSO-*d*<sub>6</sub> the internal standard was TMS or residual solvent signals (2.49 and 39.9 ppm <sup>1</sup>H and for <sup>13</sup>C nuclei in DMSO-*d*<sub>6</sub>).

Sample were analyzed by HPLC-MS on an Agilent 1260 Infinity II chromatograph coupled to an Agilent 6545 LC/Q-TOF high-resolution mass spectrometer with a Dual AJS ESI ionization source operating in positive ion mode using the following parameters: capillary voltage: 4000 V; spray pressure: 20 (psi); drying gas: 10 l/min; gas temperature: 325°C; sheathed gas flow: 12 l/min; shielding gas temperature: 400°C; nozzle voltage: 0 V, fragmentation voltage: 180 V; skimmer voltage: 45 V; octopole RF: 750 V. Mass spectra with LC/MS accuracy were recorded in the range 100-1000 m/z, scan rate 1.5 spectrum/s.

Chromatographic separation was carried out on columns: ZORBAX RRHD Eclipse Plus C18 (2.1 x 50 mm, particle size 1.8  $\mu$ m). The column temperature during the analysis was maintained at 35°C. The mobile phase was formed by eluents A and B. In the positive ionization mode, 0.1% formic acid solution in deionized water was used as eluent A, and 0.1% formic acid solution in acetonitrile was used as eluent B. Chromatographic separation was performed with elution according to the following scheme: 0-10 min 95% A, 10-13 min 100% B, 13-15 min 95% A. The flow of the mobile phase was maintained at 400  $\mu$ L/min throughout the analysis. In all experiments, the sample injection volume was 1  $\mu$ L. The sample was prepared by dissolving the entire sample (in 1000  $\mu$ L) in methanol (for HPLC). Sample dilution was carried out immediately before analysis.

The recorded data were processed using Agilent MassHunter 10.0 software.

Melting points were determined using a Stuart SMP10 hot bench. Monitoring of the reaction course and the purity of the products was carried out by TLC on Sorbfil plates and visualized using iodine vapor or UV light.

Synthesis of compounds N-(4,6-dimethyl-2-oxo-1,2-dihydropyridin-3-yl)-2-hydrazinyl-2-thioacetamide (4a), 2-Hydrazinyl-N-(6-methyl-2-oxo-4-phenyl-1,2-dihydropyridin-3-yl)-2-thioacetamide (4b), 2-Hydrazinyl-N-(6-methyl-2-oxo-4-(thiophen-2-yl)-1,2-dihydropyridin-3-yl)-2-thioacetamide (4c), 3-(5-((4,6-dimethyl-2-oxo-1,2-dihydropyridin-3-yl)carbamoyl)-1,3,4-thiadiazol-2-yl)propanoic (5a), 3-(5-((6-methyl-2-oxo-4-phenyl-1,2-dihydropyridin-3-yl)carbamoyl)-1,3,4-thiadiazol-2-yl)propanoic acid (5b) and 3-(5-((6-methyl-2-oxo-4-(thiophen-2-yl)-1,2-dihydropyridin-3-yl)carbamoyl)-1,3,4-thiadiazol-2-yl)propanoic acid (5c) acid is given in the article [24]

### Synthesis of thiadiazoles derivatives 7-9a-c

To (1 mmol) of oxamic acid thiohydrazide 4a-c in 3 ml of acetic acid was added (3.0 mmol) of the corresponding anhydride (glutaric acid, phthalic acid and maleic acid). The reaction mixture was heated at reflux temperature on vigorous stirring over 5 h, cooled down and poured into water (25 mL). The resulting precipitates were filtered off and dried in air to obtain compounds 7-9a-c in the indicated yields.

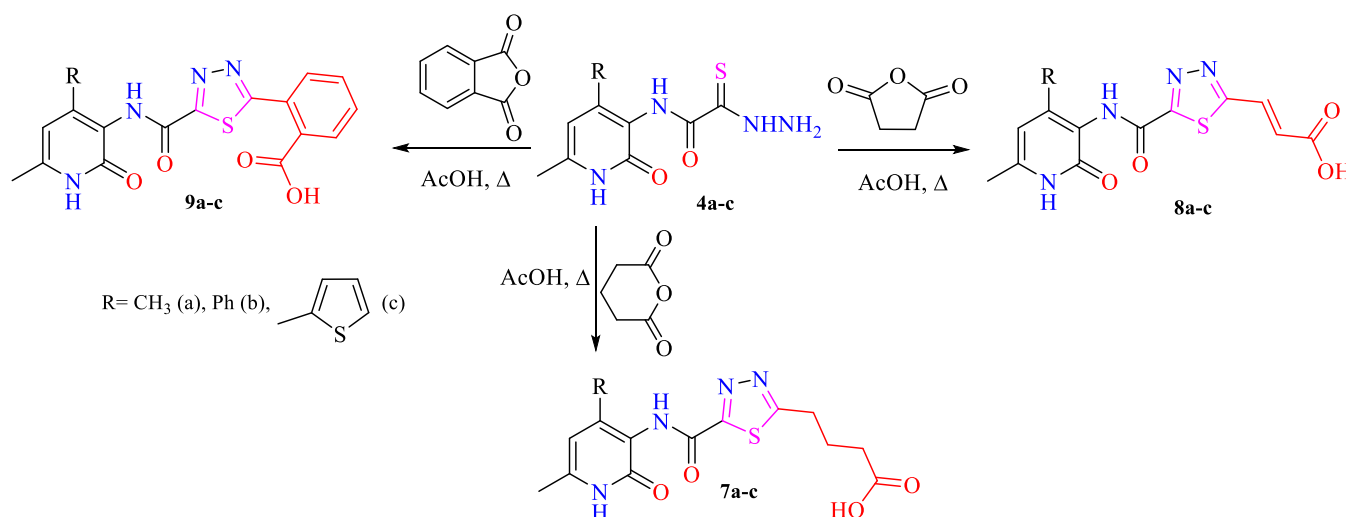

### Characterization data of products 7-9a-c

|                                                                                                               |                                                                                                                                                                                                                                                                                                                                                                                                                                                                                                                                                                                                                                                                                                                                                                                                                                                                                                                                              |
|---------------------------------------------------------------------------------------------------------------|----------------------------------------------------------------------------------------------------------------------------------------------------------------------------------------------------------------------------------------------------------------------------------------------------------------------------------------------------------------------------------------------------------------------------------------------------------------------------------------------------------------------------------------------------------------------------------------------------------------------------------------------------------------------------------------------------------------------------------------------------------------------------------------------------------------------------------------------------------------------------------------------------------------------------------------------|
| <p>Chemical Formula: C<sub>14</sub>H<sub>16</sub>N<sub>4</sub>O<sub>4</sub>S<br/>Molecular Weight: 336,37</p> | <p><b>4-(5-((4,6-dimethyl-2-oxo-1,2-dihydropyridin-3-yl)carbamoyl)-1,3,4-thiadiazol-2-yl)butanoic acid (7a).</b></p> <p>Beige powder, yield 192 mg, 80%. M.p. 248-250°C.</p> <p><sup>1</sup>H NMR (400 MHz, DMSO-<i>d</i><sub>6</sub>) δ ppm 1.98 (p, <i>J</i>=7.3 Hz, 2H, 3-CH<sub>2</sub>); 2.02 (s, 3H, CH<sub>3</sub>); 2.14 (s, 3H, CH<sub>3</sub>); 2.35 (t, <i>J</i>=7.1 Hz, 2H, 2-CH<sub>2</sub>); 3.19 (t, <i>J</i>=7.1 Hz, 2H, 4-CH<sub>2</sub>); 5.93 (s, 1H, H-5); 9.92 (s, 1H, NHCO'); 11.79 (br. s, 2H, NHCO, COOH).</p> <p><sup>13</sup>C NMR (100 MHz, DMSO-<i>d</i><sub>6</sub>) δ ppm 18.1 (CH<sub>3</sub>); 18.2 (CH<sub>3</sub>); 24.7 (3-CH<sub>2</sub>); 28.8 (4-CH<sub>2</sub>); 32.6 (2-CH<sub>2</sub>); 106.6 (C-5); 121.3; 142.6; 147.3; 156.4; 159.8; 165.23; 173.7; 174.1.</p> <p>HRMS <i>m/z</i>: calcd for C<sub>14</sub>H<sub>17</sub>N<sub>4</sub>O<sub>4</sub>S<sup>+</sup>[M+H]<sup>+</sup>: 337.0965;</p> |
|---------------------------------------------------------------------------------------------------------------|----------------------------------------------------------------------------------------------------------------------------------------------------------------------------------------------------------------------------------------------------------------------------------------------------------------------------------------------------------------------------------------------------------------------------------------------------------------------------------------------------------------------------------------------------------------------------------------------------------------------------------------------------------------------------------------------------------------------------------------------------------------------------------------------------------------------------------------------------------------------------------------------------------------------------------------------|

|                                                                                                                                                                                                               |                                                                                                                                                                                                                                                                                                                                                                                                                                                                                                                                                                                                                                                                                                                                                                                                                                                                                                                                                                                                                                                                 |
|---------------------------------------------------------------------------------------------------------------------------------------------------------------------------------------------------------------|-----------------------------------------------------------------------------------------------------------------------------------------------------------------------------------------------------------------------------------------------------------------------------------------------------------------------------------------------------------------------------------------------------------------------------------------------------------------------------------------------------------------------------------------------------------------------------------------------------------------------------------------------------------------------------------------------------------------------------------------------------------------------------------------------------------------------------------------------------------------------------------------------------------------------------------------------------------------------------------------------------------------------------------------------------------------|
| 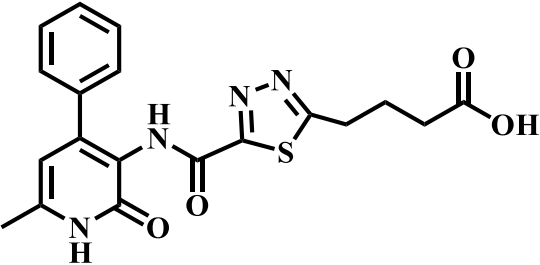 <p>Chemical Formula: C<sub>19</sub>H<sub>18</sub>N<sub>4</sub>O<sub>4</sub>S<br/>Molecular Weight: 398,4370</p>             | <p>found: 337.0998</p> <p><b>4-(5-((6-Methyl-2-oxo-4-phenyl-1,2-dihydropyridin-3-yl)carbamoyl)-1,3,4-thiadiazol-2-yl)butanoic acid (7b).</b></p> <p>Beige powder, yield 218 mg, 72%. M.p. 243-246°C.</p> <p><sup>1</sup>H NMR (400 MHz, DMSO-<i>d</i><sub>6</sub>) δ ppm 1.96 (p, <i>J</i>=7.6 Hz, 2H, 3-CH<sub>2</sub>); 2.24 (s, 3H, CH<sub>3</sub>); 2.34 (t, <i>J</i>=7.1 Hz, 2H, 2-CH<sub>2</sub>); 3.16 (t, <i>J</i>=7.6 Hz, 2H, 4-CH<sub>2</sub>); 6.08 (s, 1H, H-5); 7.34-7.39 (m, 3H, H-3,4,5 Ph); 7.46 (d, <i>J</i>=7.6 Hz, 2H, H-2,6 Ph); 10.07 (s, 1H, NHCO'); 12.05 (br. s, 2H, NHCO, COOH).</p> <p><sup>13</sup>C NMR (100 MHz, DMSO-<i>d</i><sub>6</sub>) δ ppm 18.3 (CH<sub>3</sub>); 24.5 (3-CH<sub>2</sub>); 28.6 (4-CH<sub>2</sub>); 32.5 (2-CH<sub>2</sub>); 105.5 (C-5); 119.9; 127.6 (2C Ph); 128.1 (2C Ph); 128.3 (1C Ph); 137.2; 143.9; 149.6; 156.9; 160.3; 164.9; 173.7; 173.9.</p> <p>HRMS <i>m/z</i>: calcd for C<sub>19</sub>H<sub>19</sub>N<sub>4</sub>O<sub>4</sub>S<sup>+</sup>[M+H]<sup>+</sup>: 399.1122; found: 399.1136</p> |
|  <p>Chemical Formula: C<sub>17</sub>H<sub>16</sub>N<sub>4</sub>O<sub>4</sub>S<sub>2</sub><br/>Molecular Weight: 404,46</p> | <p><b>4-(5-((6-Methyl-2-oxo-4-(thiophen-2-yl)-1,2-dihydropyridin-3-yl)carbamoyl)-1,3,4-thiadiazol-2-yl)butanoic acid (7c)</b></p> <p>Beige powder, yield 228 mg, 74%. M.p. 197-200°C.</p> <p><sup>1</sup>H NMR (400 MHz, DMSO-<i>d</i><sub>6</sub>) δ ppm 2.0 (p, <i>J</i>=6.6 Hz, 2H, 3-CH<sub>2</sub>); 2.23 (s, 3H, CH<sub>3</sub>); 2.36 (t, <i>J</i>=6.6 Hz, 2H, 2-CH<sub>2</sub>); 3.20 (t, <i>J</i>=6.6 Hz, 2H, 4-CH<sub>2</sub>); 6.48 (s, 1H, H-5); 7.13 (br. d, <i>J</i>=4.9 Hz, 1H, H-4 thiophene); 7.69 (br. s, 2H, H-3,5 thiophene); 10.27 (s, 1H, NHCO'); 11.84 (br. s, 2H, NHCO, COOH).</p> <p><sup>13</sup>C NMR (100 MHz, DMSO-<i>d</i><sub>6</sub>) δ ppm 18.5 (CH<sub>3</sub>); 24.7 (3-CH<sub>2</sub>); 28.8 (4-CH<sub>2</sub>); 32.6 (2-CH<sub>2</sub>); 102.7 (C-5); 118.4; 127.2; 129.2; 130.2; 137.1; 141.5; 143.7; 157.8; 160.4; 165.2; 173.9; 174.2.</p> <p>HRMS <i>m/z</i>: calcd for C<sub>17</sub>H<sub>17</sub>N<sub>4</sub>O<sub>4</sub>S<sub>2</sub><sup>+</sup>[M+H]<sup>+</sup>: 405.0686; found: 405.0701.</p>               |
|  <p>Chemical Formula: C<sub>13</sub>H<sub>12</sub>N<sub>4</sub>O<sub>4</sub>S<br/>Molecular Weight: 320,3230</p>           | <p><b>(E)-3-(5-((4,6-dimethyl-2-oxo-1,2-dihydropyridin-3-yl)carbamoyl)-1,3,4-thiadiazol-2-yl)acrylic acid (8a).</b></p> <p>Beige crystals, yield 149 mg, 62%. M.p. 261-263°C</p> <p><sup>1</sup>H NMR (80 MHz, DMSO-<i>d</i><sub>6</sub>) δ ppm 1.97 (s, 3H, CH<sub>3</sub>); 2.12 (s, 3H, CH<sub>3</sub>); 5.90 (s, 1H, H-5); 6.88 (d, <i>J</i>=15.6, 1H, =CHCOH); 7.80 (d, <i>J</i>=15.6, 1H, 3-CH=); 9.13 (s, 1H, 1-NHCO'); 11.91 (s, 1H, 1-NH); 12.17 (bs, 1H, OH). <sup>13</sup>C NMR (21 MHz, DMSO-<i>d</i><sub>6</sub>) δ ppm 18.2 (CH<sub>3</sub>); 18.3 (CH<sub>3</sub>); 106.7 (C-5); 121.3; 126.6 (=CHCOH); 134.7 (3-CH=); 139.8; 142.1; 146.2; 159.3; 158.8; 160.9; 170.8.</p> <p>HRMS <i>m/z</i>: calcd for C<sub>13</sub>H<sub>13</sub>N<sub>4</sub>O<sub>4</sub>S<sup>+</sup>[M+H]<sup>+</sup>: 321.0652; found: 321.0645</p>                                                                                                                                                                                                                    |

|                                                                                                                                                                                                                |                                                                                                                                                                                                                                                                                                                                                                                                                                                                                                                                                                                                                                                                                                                                                                                                                                                                                                                     |
|----------------------------------------------------------------------------------------------------------------------------------------------------------------------------------------------------------------|---------------------------------------------------------------------------------------------------------------------------------------------------------------------------------------------------------------------------------------------------------------------------------------------------------------------------------------------------------------------------------------------------------------------------------------------------------------------------------------------------------------------------------------------------------------------------------------------------------------------------------------------------------------------------------------------------------------------------------------------------------------------------------------------------------------------------------------------------------------------------------------------------------------------|
| 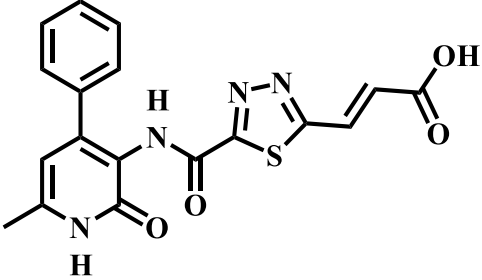 <p>Chemical Formula: C<sub>18</sub>H<sub>14</sub>N<sub>4</sub>O<sub>4</sub>S<br/>Molecular Weight: 382,3940</p>              | <p><b>(E)-3-(5-((6-methyl-2-oxo-4-phenyl-1,2-dihydropyridin-3-yl)carbamoyl)-1,3,4-thiadiazol-2-yl)acrylic acid (8b).</b><br/>White crystals, yield 151 mg, 50%. M.p. 199-202°C<br/><sup>1</sup>H NMR (500 MHz, DMSO-<i>d</i><sub>6</sub>) δ ppm 2.21 (s, 3H, CH<sub>3</sub>); 6.03 (s, 1H, H-5); 6.90 (d, 1H, <i>J</i>=16.0, =CHCOH); 7.33-7.38 (m, 5H, H-2,3,4,5 Ph); 7.78 (d, 1H, <i>J</i>=16.0, 1H, 3-CH=); 9.28 (s, 1H, 1-NHCO'); 11.85 (s, 1H, 1-NH); 11.93 (bs, 1H, OH). <sup>13</sup>C NMR (125 MHz, DMSO-<i>d</i><sub>6</sub>) δ ppm 18.4 (CH<sub>3</sub>); 105.6 (C-5); 120.2; 126.2 (=CHCOH); 127.6 (2C Ph); 128.2 (2C Ph); 128.3 (1C Ph); 135.6 (3-CH=); 137.4; 139.7; 143.5; 148.9; 159.9; 160.5; 160.8; 170.7.<br/>HRMS <i>m/z</i>: calcd for C<sub>18</sub>H<sub>15</sub>N<sub>4</sub>O<sub>4</sub>S<sup>+</sup>[M+H]<sup>+</sup>: 383.0809; found: 383.0831.</p>                                     |
|  <p>Chemical Formula: C<sub>16</sub>H<sub>12</sub>N<sub>4</sub>O<sub>4</sub>S<sub>2</sub><br/>Molecular Weight: 388,4160</p> | <p><b>(E)-3-(5-((6-methyl-2-oxo-4-(thiophen-2-yl)-1,2-dihydropyridin-3-yl)carbamoyl)-1,3,4-thiadiazol-2-yl)acrylic acid (8c).</b><br/>Grey crystals, yield 216 mg, 70%. M.p. 247-250°C<br/><sup>1</sup>H NMR (500 MHz, DMSO-<i>d</i><sub>6</sub>) δ ppm 2.21 (s, 3H, CH<sub>3</sub>); 6.45 (s, 1H, H-5); 6.95 (d, 1H, <i>J</i>=16.0, =CHCOH); 7.13-7.15 (m, 1H, H-4' Th); 7.65-7.69 (m, 2H, H-3',5' Th); 7.79 (d, 1H, <i>J</i>=16.0, 3-CH=); 9.50 (s, 1H, 1-NHCO'); 11.75 (bs, 1H, OH); 11.97 (bs, 1H, 1-NH); <sup>13</sup>C NMR (125 MHz, DMSO-<i>d</i><sub>6</sub>) δ ppm 18.5 (CH<sub>3</sub>); 102.7 (C-5); 118.6; 126.6 (=CHCOH); 127.1 (1C Th); 128.9 (1C Th); 129.9 (1C Th); 135.4 (3-CH=); 137.2; 139.9; 141.2; 143.3; 160.5; 160.9; 170.7.<br/>HRMS <i>m/z</i>: calcd for C<sub>16</sub>H<sub>13</sub>N<sub>4</sub>O<sub>4</sub>S<sub>2</sub><sup>+</sup>[M+H]<sup>+</sup>: 389.0373; found: 389.0396.</p> |
|  <p>Chemical Formula: C<sub>17</sub>H<sub>14</sub>N<sub>4</sub>O<sub>4</sub>S<br/>Molecular Weight: 370,38</p>              | <p><b>2-(5-((4,6-dimethyl-2-oxo-1,2-dihydropyridin-3-yl)carbamoyl)-1,3,4-thiadiazol-2-yl)benzoic acid (9a).</b><br/>Gray powder, yield 266 mg, 72%. M.p. 315-318°C.<br/><sup>1</sup>H NMR (400 MHz, DMSO-<i>d</i><sub>6</sub>) δ ppm 2.06 (s, 3H, CH<sub>3</sub>); 2.16 (s, 3H, CH<sub>3</sub>); 5.95 (s, 1H, H-5); 9.64 (s, 1H, NHCO'); 10.08 (s, 1H, NHCO); 11.79 (bs, 1H, OH). <sup>13</sup>C NMR (100 MHz, DMSO-<i>d</i><sub>6</sub>) δ ppm 18.1 (CH<sub>3</sub>); 18.2 (CH<sub>3</sub>); 106.6 (C-5); 121.2; 124.1 (C Ph); 129.3 (C Ph); 129.9 (C Ph); 131.7 (C Ph); 132.5 (C Ph); 135.7 (C Ph); 142.9; 147.4; 156.3; 159.7; 166.1; 167.7; 170.3.<br/>HRMS <i>m/z</i>: calcd for C<sub>17</sub>H<sub>15</sub>N<sub>4</sub>O<sub>4</sub>S<sup>+</sup>[M+H]<sup>+</sup>: 371.0809; found: 371.0825</p>                                                                                                           |

|                                                                                                                                                                                                             |                                                                                                                                                                                                                                                                                                                                                                                                                                                                                                                                                                                                                                                                                                                                                                                                                                   |
|-------------------------------------------------------------------------------------------------------------------------------------------------------------------------------------------------------------|-----------------------------------------------------------------------------------------------------------------------------------------------------------------------------------------------------------------------------------------------------------------------------------------------------------------------------------------------------------------------------------------------------------------------------------------------------------------------------------------------------------------------------------------------------------------------------------------------------------------------------------------------------------------------------------------------------------------------------------------------------------------------------------------------------------------------------------|
| 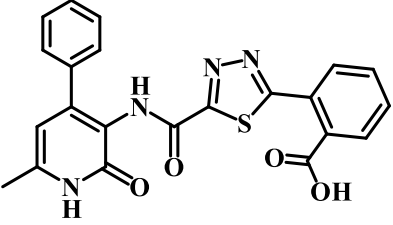 <p>Chemical Formula: C<sub>22</sub>H<sub>16</sub>N<sub>4</sub>O<sub>4</sub>S<br/>Molecular Weight: 432,45</p>             | <p><b>2-(5-((6-methyl-2-oxo-4-phenyl-1,2-dihydropyridin-3-yl)carbamoyl)-1,3,4-thiadiazol-2-yl)benzoic acid (9b)</b><br/>Gray powder, yield 368 mg, 85%. M.p. 176-180 °C.<br/><sup>1</sup>H NMR (80 MHz, DMSO-<i>d</i><sub>6</sub>) δ ppm 2.41 (s, 3H, CH<sub>3</sub>); 6.08 (s, 1H, H-5); 7.42-7.92 (m, 9H, H-2,3,4,5,6 Ph; H-3,4,5,6 Ph'); 10.18 (s, 1H, NHCO'); 11.99 (br. s, 2H, NHCO, OH).<br/><sup>13</sup>C NMR (21 MHz, DMSO- <i>d</i><sub>6</sub>) δ ppm 18.4 (CH<sub>3</sub>); 105.6 (C-5); 120.1; 127.7 (2C Ph); 128.3 (3C Ph); 128.6 (2C Ph); 129.9; 131.3; 131.5; 132.8; 137.2; 144.1; 149.8; 157.0; 160.3; 165.9; 167.8; 170.2.<br/>HRMS m/z: calcd for C<sub>22</sub>H<sub>17</sub>N<sub>4</sub>O<sub>4</sub>S<sup>+</sup>[M+H]<sup>+</sup>: 433.0965; found: 433.0970.</p>                                         |
|  <p>Chemical Formula: C<sub>20</sub>H<sub>14</sub>N<sub>4</sub>O<sub>4</sub>S<sub>2</sub><br/>Molecular Weight: 438,48</p> | <p><b>2-(5-((6-methyl-2-oxo-4-(thiophen-2-yl)-1,2-dihydropyridin-3-yl)carbamoyl)-1,3,4-thiadiazol-2-yl)benzoic acid (9c)</b><br/>Gray powder, yield 411 mg, 94%. M.p. 275-277°C.<br/><sup>1</sup>H NMR (80 MHz, DMSO- <i>d</i><sub>6</sub>) δ ppm 2.24 (s, 3H, CH<sub>3</sub>); 6.50 (s, 1H, H-5); 7.11-7.21 (m, 1H, H-4 thiophene); 7.70-7.89 (m, 6H, H-3,5 thiophene, H-3,4,5,6 Ph); 10.42 (s, 1H, NHCO'); 11.30-12.20 (m, 2H, NHCO, OH).<br/><sup>13</sup>C NMR (21 MHz, DMSO-<i>d</i><sub>6</sub>) δ ppm 18.5 (CH<sub>3</sub>); 102.7; 118.4; 127.3; 128.6; 129.2; 129.9; 130.1; 131.4; 131.7; 132.5; 137.0; 141.5; 143.8; 157.7; 160.1; 160.4; 166.0; 167.7; 170.3.<br/>HRMS m/z: calcd for C<sub>20</sub>H<sub>15</sub>N<sub>4</sub>O<sub>4</sub>S<sub>2</sub><sup>+</sup>[M+H]<sup>+</sup>: 439.0529; found: 439.0535.</p> |

## Author Contributions

Spectrophotometric studies were performed on the basis of the Research Resource Center “Natural Resource Management and Physico-Chemical Research” Institute of Chemistry, Tyumen State University.

## Copies of NMR Spectra of Products

| No. | (ppm) | (Hz)  | Height | No. | (ppm) | (Hz)   | Height |
|-----|-------|-------|--------|-----|-------|--------|--------|
| 1   | 1.94  | 777.0 | 0.0230 | 9   | 2.36  | 945.1  | 0.0728 |
| 2   | 1.96  | 783.9 | 0.0726 | 10  | 3.17  | 1266.5 | 0.0813 |
| 3   | 1.98  | 791.2 | 0.1121 | 11  | 3.19  | 1273.4 | 0.1376 |
| 4   | 2.00  | 798.5 | 0.0945 | 12  | 3.20  | 1280.7 | 0.0774 |
| 5   | 2.02  | 807.2 | 0.4623 | 13  | 5.93  | 2369.7 | 0.1638 |
| 6   | 2.14  | 856.2 | 0.4470 | 14  | 9.92  | 3967.1 | 0.1144 |
| 7   | 2.33  | 930.9 | 0.0891 | 15  | 11.82 | 4726.3 | 0.0094 |
| 8   | 2.35  | 938.2 | 0.1529 |     |       |        |        |

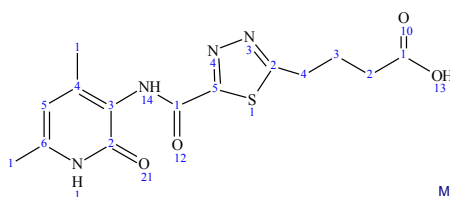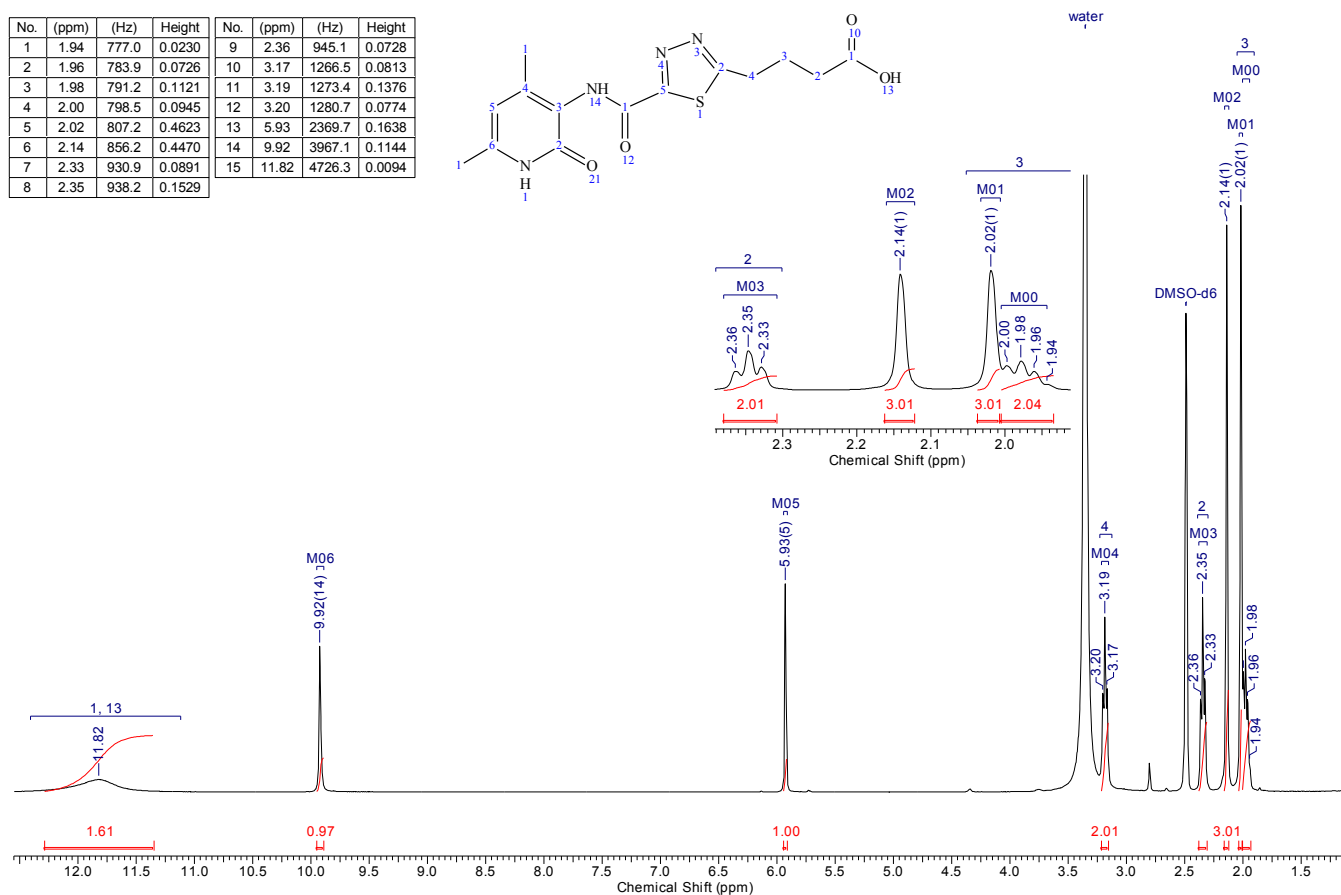

| No. | (ppm)  | (Hz)    | Height | No. | (ppm)  | (Hz)    | Height |
|-----|--------|---------|--------|-----|--------|---------|--------|
| 1   | 18.08  | 1817.1  | 0.0240 | 8   | 142.80 | 14354.8 | 0.0234 |
| 2   | 18.22  | 1831.5  | 0.0364 | 9   | 147.25 | 14802.4 | 0.0200 |
| 3   | 24.69  | 2482.3  | 0.0238 | 10  | 156.36 | 15717.7 | 0.0161 |
| 4   | 28.79  | 2894.4  | 0.0172 | 11  | 159.77 | 16060.8 | 0.0272 |
| 5   | 32.57  | 3273.9  | 0.0260 | 12  | 165.23 | 16610.0 | 0.0184 |
| 6   | 106.60 | 10716.4 | 0.0124 | 13  | 173.86 | 17477.5 | 0.0423 |
| 7   | 121.25 | 12188.6 | 0.0178 | 14  | 174.13 | 17504.3 | 0.0186 |

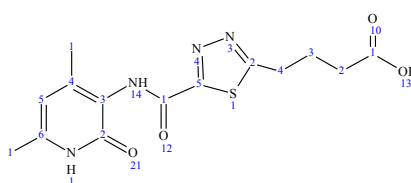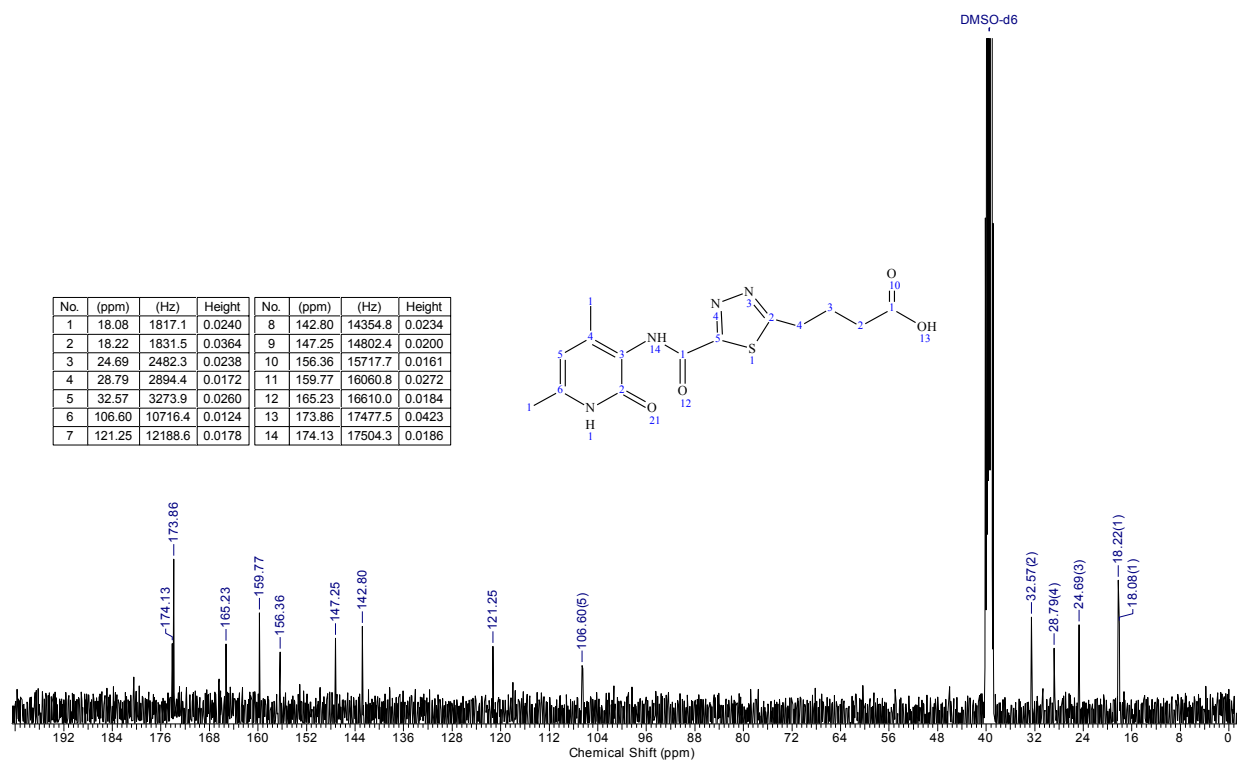

$^1\text{H}$  (500 MHz,  $\text{DMSO}-d_6$ ) and  $^{13}\text{C}$  (125 MHz,  $\text{DMSO}-d_6$ ) NMR Spectra of **7a**

| No. | (ppm) | (Hz)   | Height | No. | (ppm) | (Hz)   | Height | No. | (ppm) | (Hz)   | Height |
|-----|-------|--------|--------|-----|-------|--------|--------|-----|-------|--------|--------|
| 1   | 1.93  | 965.5  | 0.0331 | 9   | 2.35  | 1177.0 | 0.1210 | 17  | 7.38  | 3691.1 | 0.2105 |
| 2   | 1.95  | 972.8  | 0.1080 | 10  | 3.14  | 1570.6 | 0.1135 | 18  | 7.39  | 3697.9 | 0.0961 |
| 3   | 1.96  | 980.1  | 0.1574 | 11  | 3.16  | 1578.4 | 0.1877 | 19  | 7.45  | 3727.7 | 0.2402 |
| 4   | 1.98  | 987.9  | 0.1134 | 12  | 3.17  | 1585.8 | 0.1069 | 20  | 7.47  | 3735.0 | 0.1687 |
| 5   | 1.99  | 995.2  | 0.0361 | 13  | 6.08  | 3039.2 | 0.2550 | 21  | 10.07 | 5036.0 | 0.1445 |
| 6   | 2.24  | 1122.0 | 0.6559 | 14  | 7.34  | 3669.1 | 0.0946 | 22  | 12.05 | 6024.4 | 0.0176 |
| 7   | 2.32  | 1162.8 | 0.1419 | 15  | 7.35  | 3676.4 | 0.1110 |     |       |        |        |
| 8   | 2.34  | 1169.6 | 0.2547 | 16  | 7.37  | 3683.7 | 0.1471 |     |       |        |        |

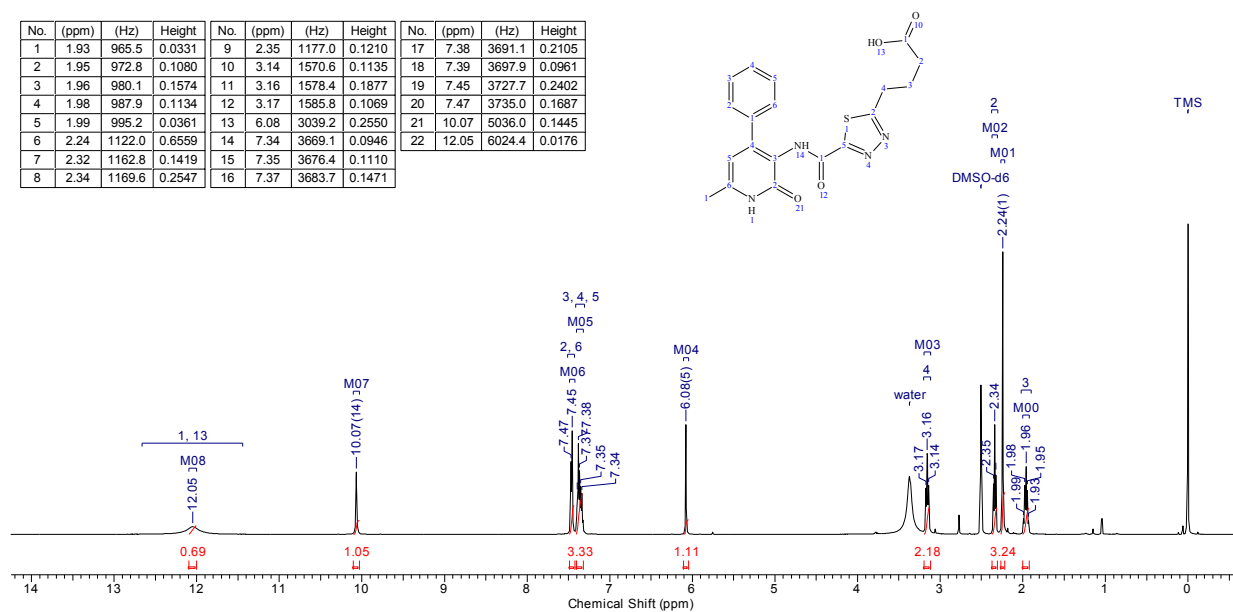

| No. | (ppm)  | (Hz)    | Height | No. | (ppm)  | (Hz)    | Height |
|-----|--------|---------|--------|-----|--------|---------|--------|
| 1   | 18.33  | 2305.2  | 0.0790 | 10  | 137.18 | 17251.1 | 0.0509 |
| 2   | 24.51  | 3081.8  | 0.0932 | 11  | 143.96 | 18104.0 | 0.0301 |
| 3   | 28.64  | 3602.3  | 0.0668 | 12  | 149.62 | 18816.1 | 0.0287 |
| 4   | 32.48  | 4084.6  | 0.1007 | 13  | 156.96 | 19738.9 | 0.0321 |
| 5   | 105.48 | 13264.7 | 0.0494 | 14  | 160.28 | 20156.7 | 0.0426 |
| 6   | 119.97 | 15086.7 | 0.0301 | 15  | 164.91 | 20739.0 | 0.0348 |
| 7   | 127.61 | 16047.6 | 0.1278 | 16  | 173.71 | 21845.3 | 0.0735 |
| 8   | 128.13 | 16114.0 | 0.1609 | 17  | 173.91 | 21870.7 | 0.0316 |
| 9   | 128.31 | 16135.8 | 0.0658 |     |        |         |        |

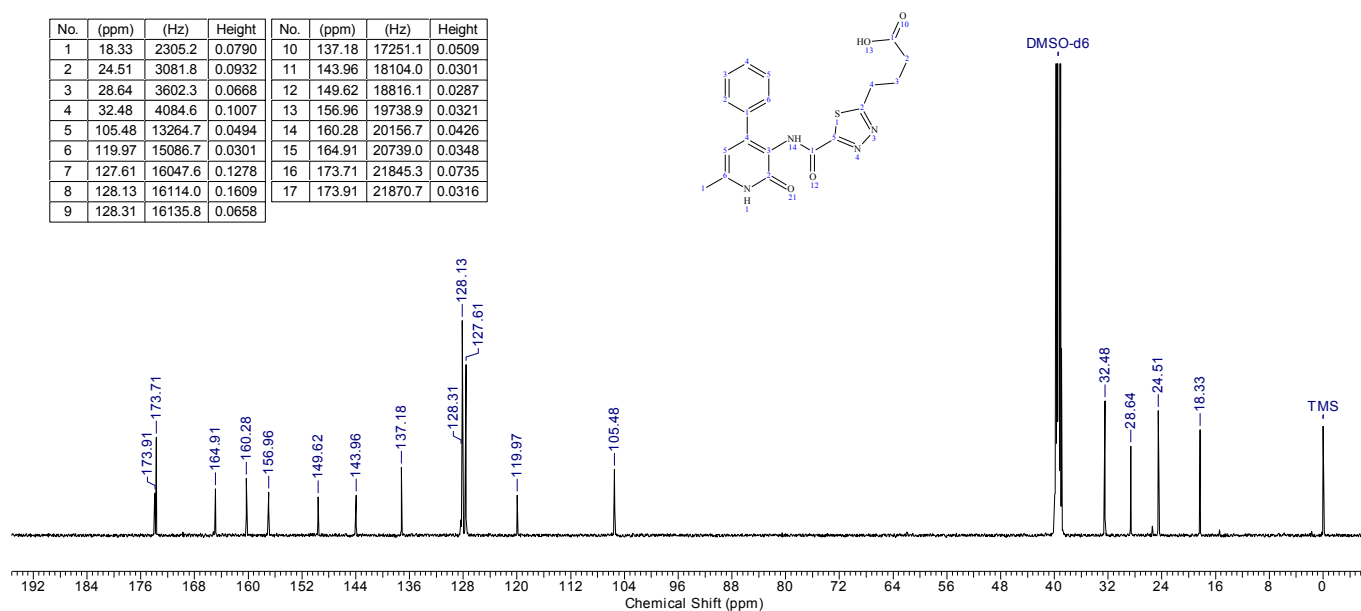

$^1\text{H}$  (500 MHz,  $\text{DMSO}-d_6$ ) and  $^{13}\text{C}$  (125 MHz,  $\text{DMSO}-d_6$ ) NMR Spectra of **7b**

| No. | (ppm) | (Hz)  | Height | No. | (ppm) | (Hz)   | Height | No. | (ppm) | (Hz)   | Height |
|-----|-------|-------|--------|-----|-------|--------|--------|-----|-------|--------|--------|
| 1   | 1.96  | 782.5 | 0.0154 | 7   | 2.35  | 938.7  | 0.0626 | 13  | 6.48  | 2591.4 | 0.1169 |
| 2   | 1.98  | 791.7 | 0.0494 | 8   | 2.36  | 945.1  | 0.0987 | 14  | 7.13  | 2850.6 | 0.0699 |
| 3   | 2.00  | 798.1 | 0.0701 | 9   | 2.38  | 951.9  | 0.0534 | 15  | 7.14  | 2854.3 | 0.0738 |
| 4   | 2.01  | 804.9 | 0.0525 | 10  | 3.19  | 1273.4 | 0.0628 | 16  | 7.69  | 3074.1 | 0.1614 |
| 5   | 2.04  | 813.6 | 0.0168 | 11  | 3.20  | 1279.8 | 0.0952 | 17  | 10.27 | 4105.8 | 0.0751 |
| 6   | 2.23  | 890.6 | 0.3179 | 12  | 3.22  | 1286.7 | 0.0596 | 18  | 11.84 | 4732.8 | 0.0098 |

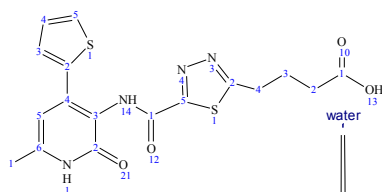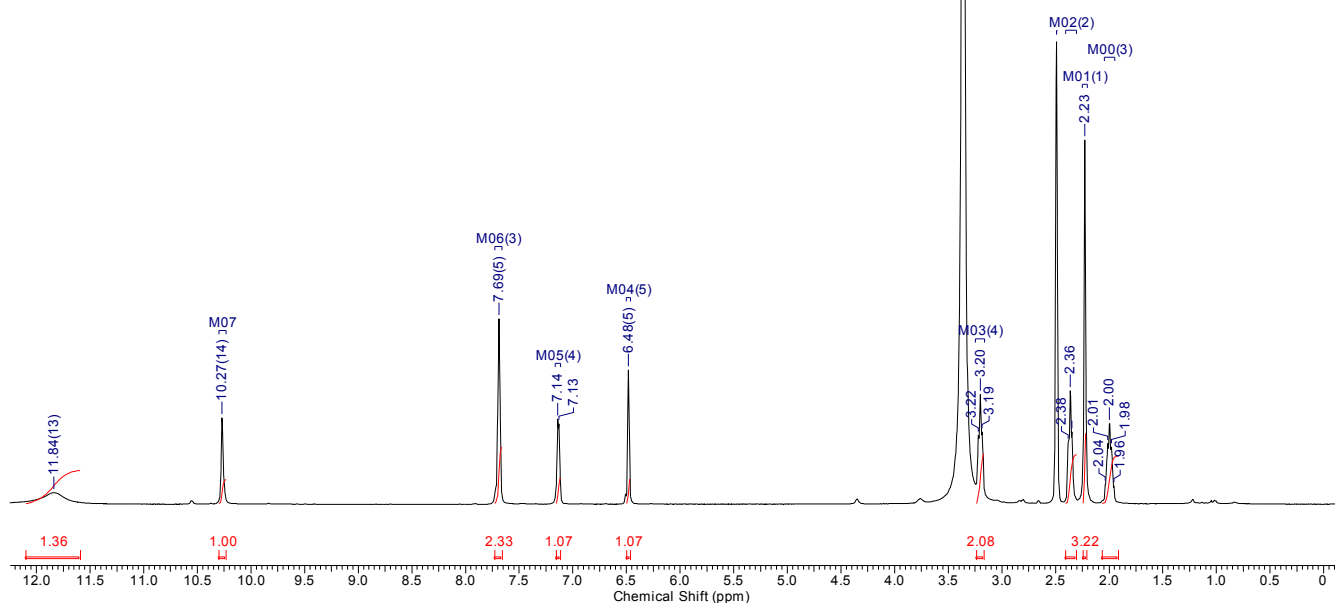

| No. | (ppm)  | (Hz)    | Height | No. | (ppm)  | (Hz)    | Height |
|-----|--------|---------|--------|-----|--------|---------|--------|
| 1   | 18.51  | 1861.2  | 0.0218 | 10  | 137.05 | 13776.8 | 0.0183 |
| 2   | 24.65  | 2478.4  | 0.0185 | 11  | 141.47 | 14221.6 | 0.0145 |
| 3   | 28.82  | 2897.3  | 0.0111 | 12  | 143.74 | 14449.7 | 0.0139 |
| 4   | 32.64  | 3280.7  | 0.0160 | 13  | 157.82 | 15865.3 | 0.0142 |
| 5   | 102.70 | 10323.5 | 0.0115 | 14  | 160.41 | 16125.1 | 0.0136 |
| 6   | 118.41 | 11903.0 | 0.0117 | 15  | 165.18 | 16604.3 | 0.0123 |
| 7   | 127.23 | 12789.6 | 0.0098 | 16  | 173.87 | 17478.4 | 0.0217 |
| 8   | 129.16 | 12984.2 | 0.0160 | 17  | 174.19 | 17510.0 | 0.0160 |
| 9   | 130.19 | 13087.7 | 0.0144 |     |        |         |        |

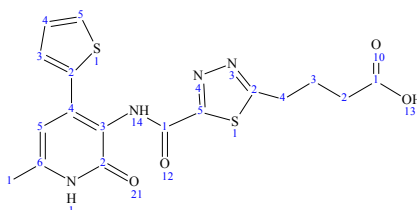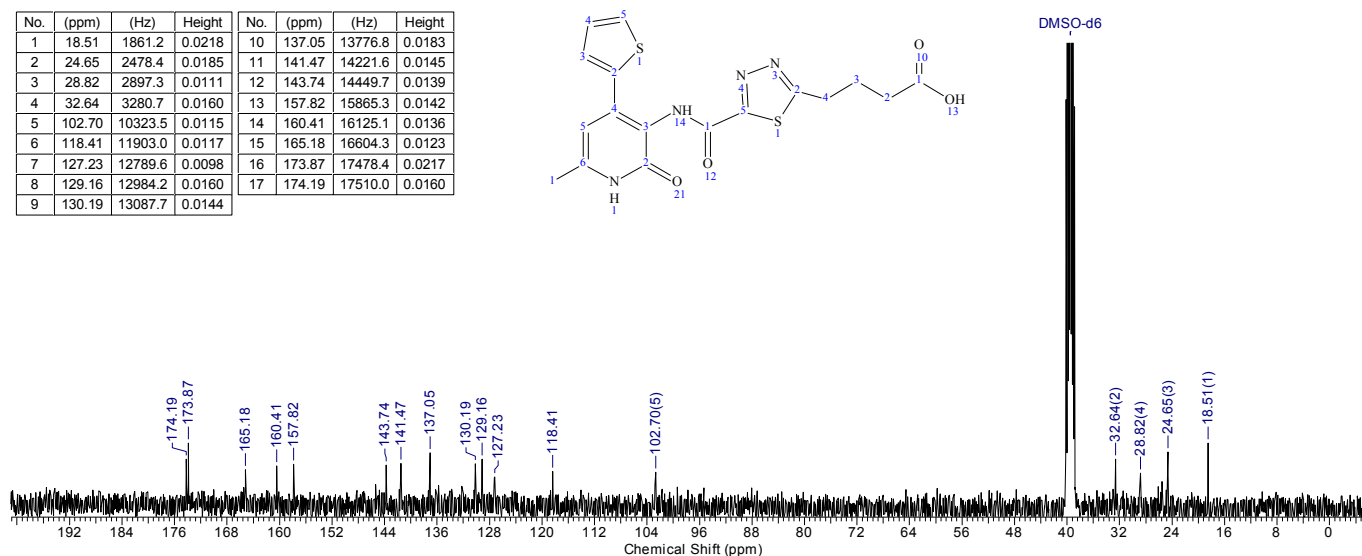

$^1\text{H}$  (500 MHz,  $\text{DMSO}-d_6$ ) and  $^{13}\text{C}$  (125 MHz,  $\text{DMSO}-d_6$ ) NMR Spectra of **7c**



| No. | (ppm) | (Hz)  | Height | No. | (ppm) | (Hz)  | Height |
|-----|-------|-------|--------|-----|-------|-------|--------|
| 1   | 1.97  | 158.5 | 1.0000 | 6   | 7.70  | 620.1 | 0.3626 |
| 2   | 2.12  | 171.0 | 0.8684 | 7   | 7.90  | 635.7 | 0.2782 |
| 3   | 5.90  | 475.0 | 0.3375 | 8   | 9.13  | 734.6 | 0.3009 |
| 4   | 6.79  | 546.4 | 0.2824 | 9   | 11.91 | 958.6 | 0.3475 |
| 5   | 6.98  | 561.8 | 0.3661 | 10  | 12.17 | 979.6 | 0.0722 |

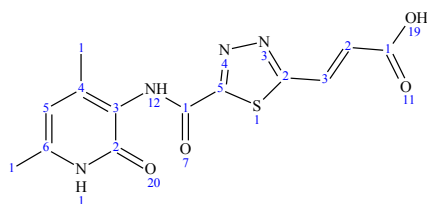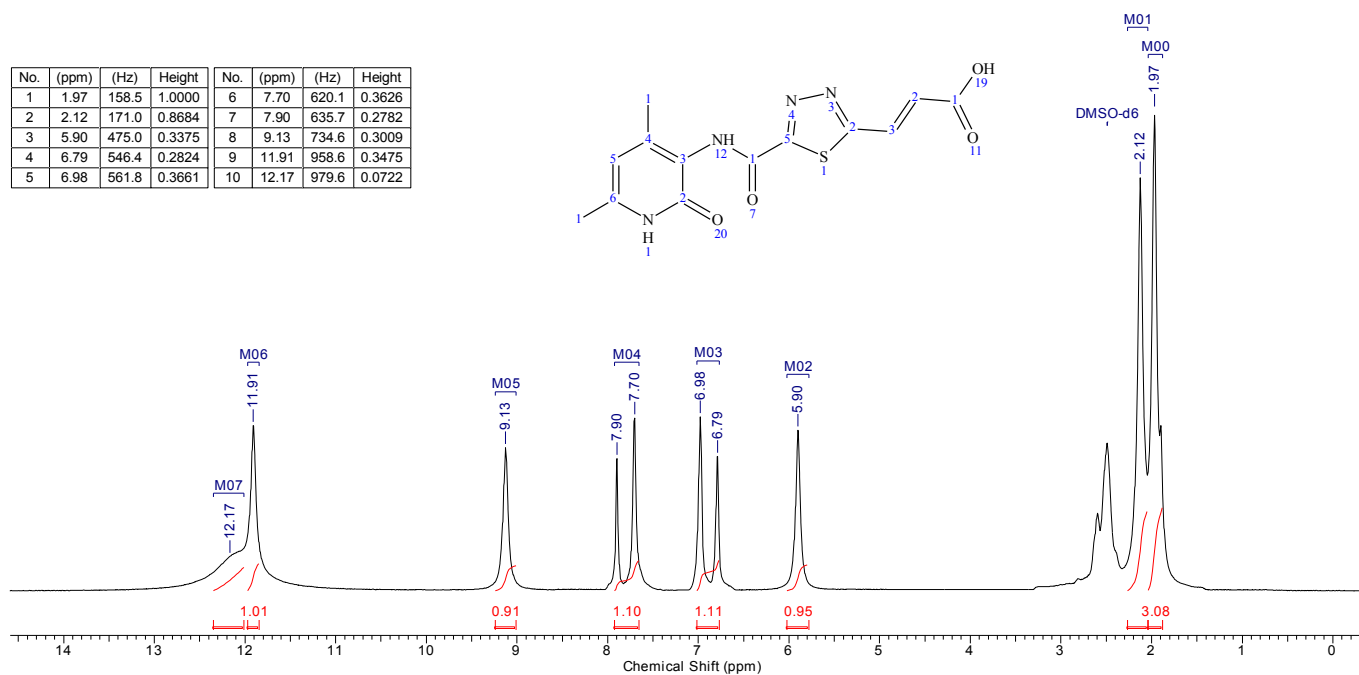

| No. | (ppm)  | (Hz)   | Height  | No. | (ppm)  | (Hz)   | Height |
|-----|--------|--------|---------|-----|--------|--------|--------|
| 1   | 18.16  | 367.6  | -0.3735 | 8   | 142.06 | 2875.9 | 0.4425 |
| 2   | 18.33  | 371.0  | -0.3894 | 9   | 146.20 | 2959.8 | 0.2839 |
| 3   | 106.71 | 2160.3 | -0.2545 | 10  | 159.28 | 3224.5 | 0.2049 |
| 4   | 121.27 | 2455.1 | 0.2555  | 11  | 159.83 | 3235.7 | 0.3781 |
| 5   | 126.58 | 2562.5 | -0.2258 | 12  | 160.97 | 3258.7 | 0.4057 |
| 6   | 134.66 | 2726.0 | -0.2240 | 13  | 170.75 | 3456.7 | 0.3965 |
| 7   | 139.85 | 2831.2 | 0.2605  |     |        |        |        |

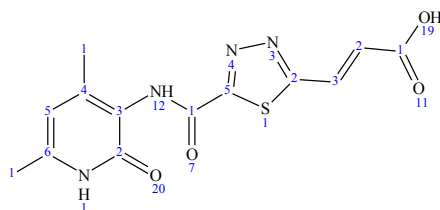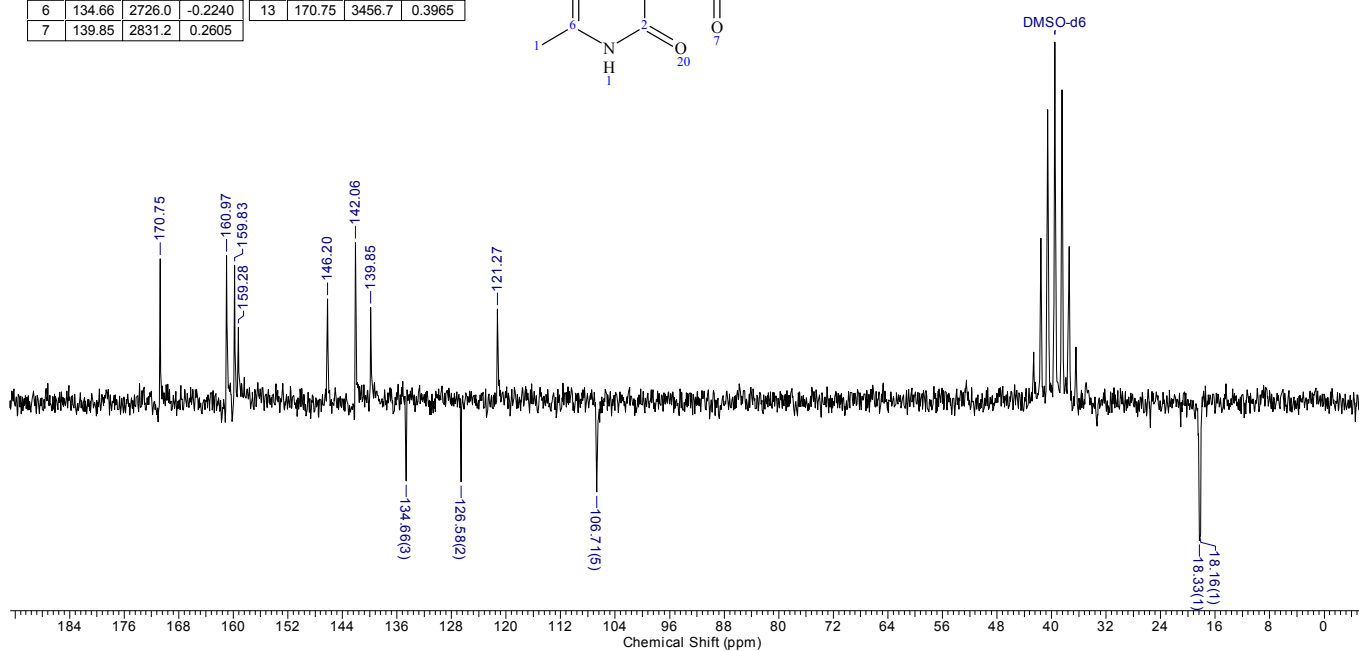

$^1\text{H}$  (80 MHz,  $\text{DMSO}-d_6$ ) and  $^{13}\text{C}$  (21 MHz,  $\text{DMSO}-d_6$ ) NMR Spectra of **8a**

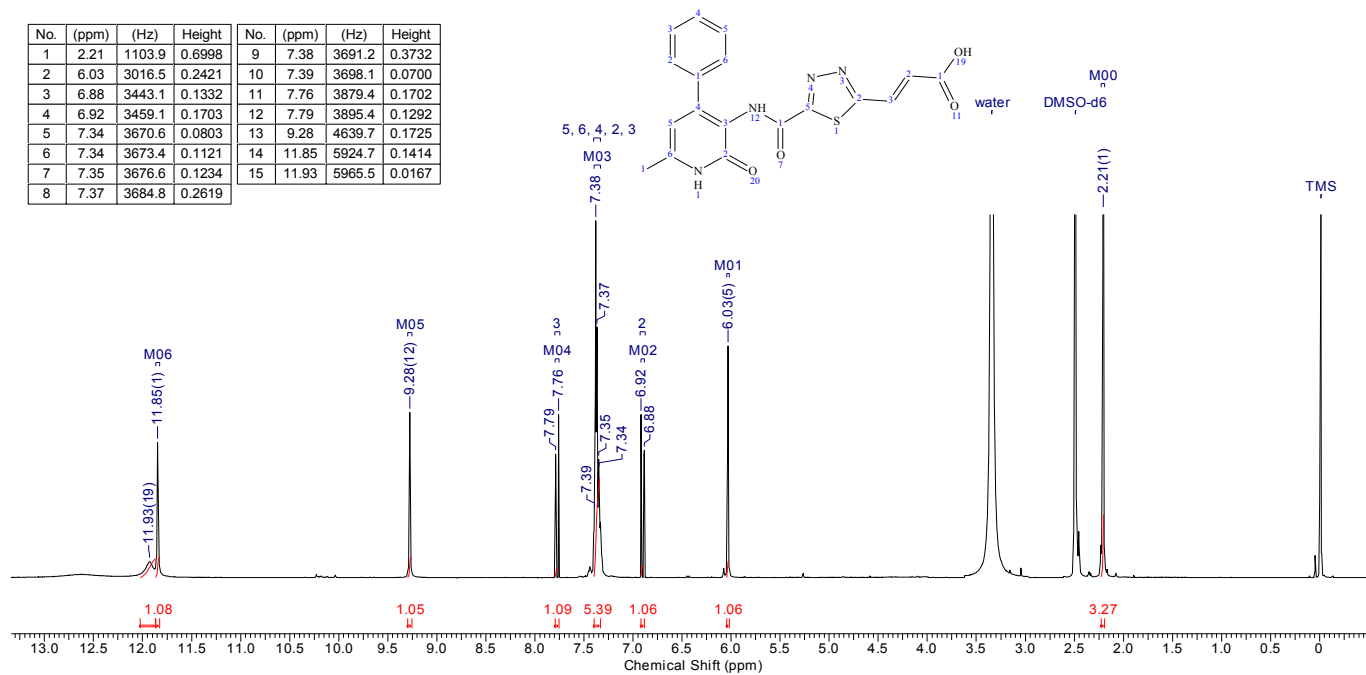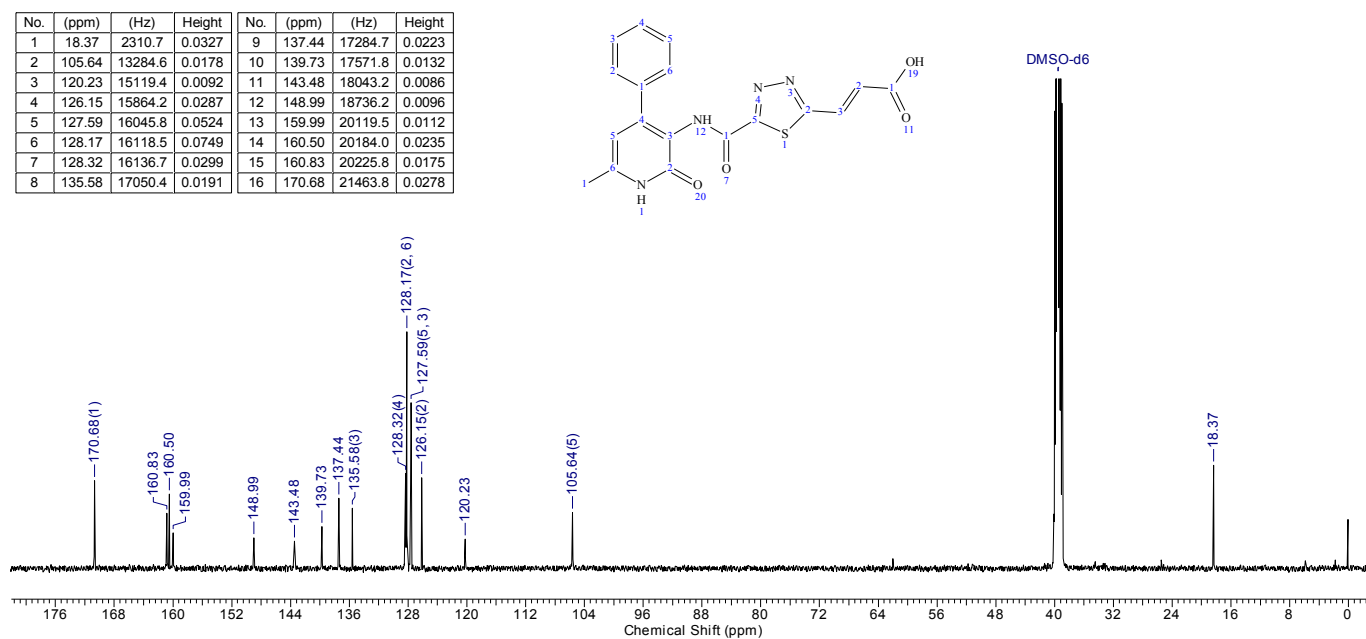

$^1\text{H}$  (400 MHz,  $\text{DMSO}-d_6$ ) and  $^{13}\text{C}$  (100 MHz,  $\text{DMSO}-d_6$ ) NMR Spectra of **8b**

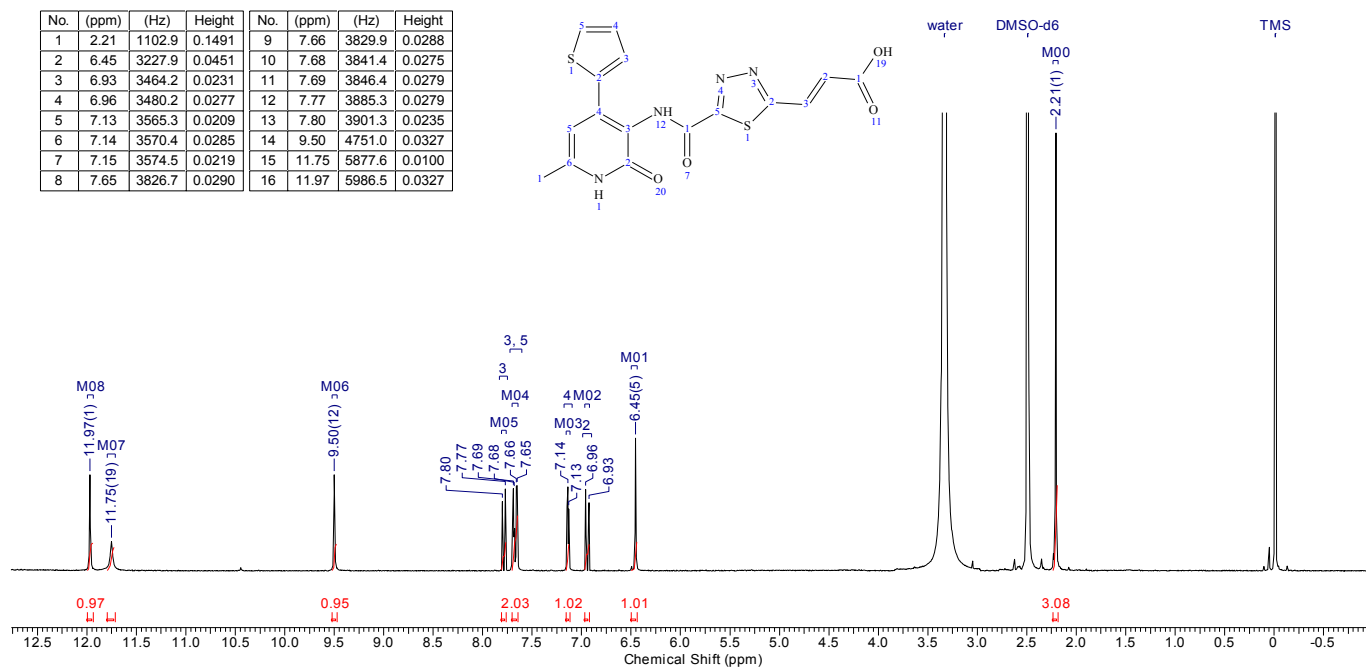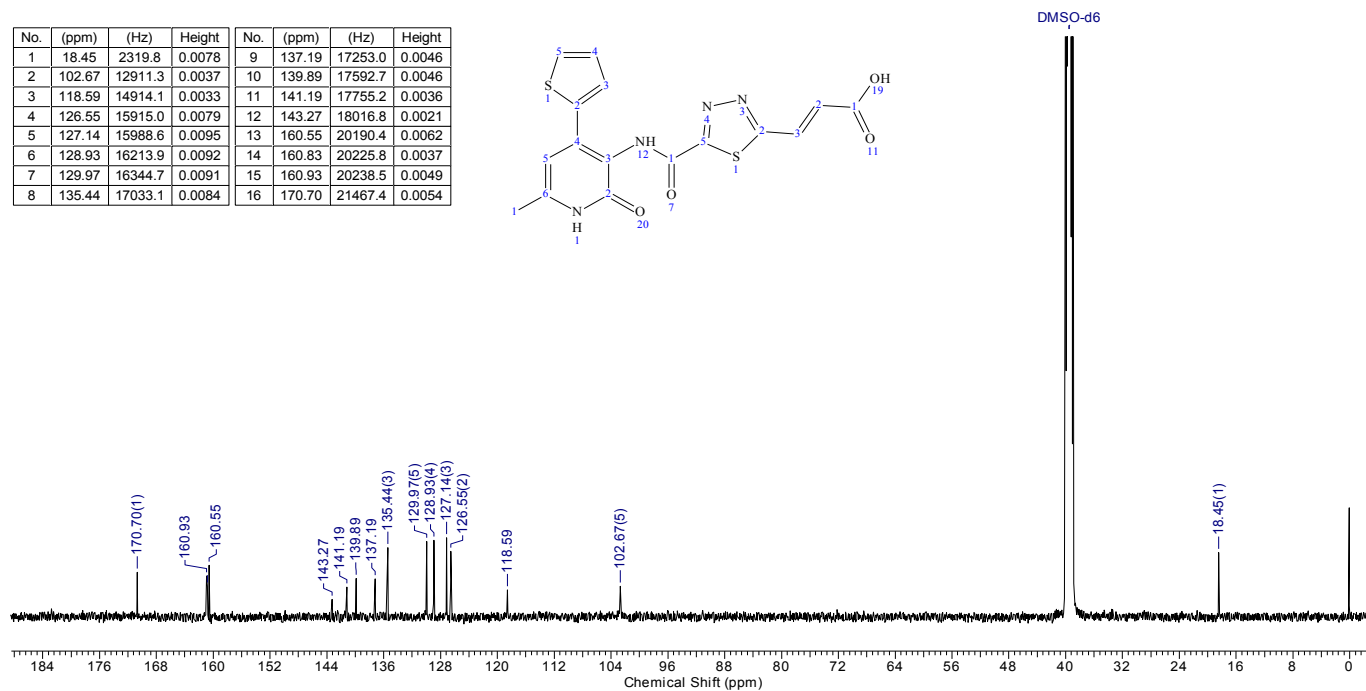

$^1\text{H}$  (400 MHz,  $\text{DMSO}-d_6$ ) and  $^{13}\text{C}$  (100 MHz,  $\text{DMSO}-d_6$ ) NMR Spectra of **8c**

| No. | (ppm) | (Hz)   | Height | No. | (ppm) | (Hz)   | Height | No. | (ppm) | (Hz)   | Height |
|-----|-------|--------|--------|-----|-------|--------|--------|-----|-------|--------|--------|
| 1   | 2.04  | 815.0  | 0.5203 | 8   | 7.74  | 3096.7 | 0.2903 | 15  | 8.01  | 3203.2 | 0.1599 |
| 2   | 2.06  | 824.4  | 0.8983 | 9   | 7.93  | 3172.1 | 0.1127 | 16  | 8.01  | 3206.2 | 0.1273 |
| 3   | 2.16  | 862.4  | 1.0000 | 10  | 7.93  | 3175.0 | 0.1215 | 17  | 8.02  | 3208.4 | 0.1190 |
| 4   | 5.95  | 2380.9 | 0.4521 | 11  | 7.95  | 3181.0 | 0.1725 | 18  | 8.03  | 3211.7 | 0.0897 |
| 5   | 7.71  | 3086.7 | 0.1555 | 12  | 7.96  | 3184.4 | 0.1348 | 19  | 9.64  | 3857.3 | 0.1295 |
| 6   | 7.72  | 3089.0 | 0.1541 | 13  | 7.96  | 3186.8 | 0.1361 | 20  | 10.08 | 4035.0 | 0.1976 |
| 7   | 7.73  | 3094.7 | 0.3319 | 14  | 7.97  | 3189.7 | 0.1682 | 21  | 11.74 | 4698.6 | 0.0197 |

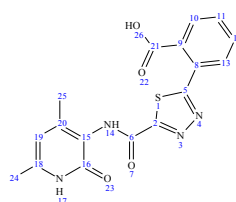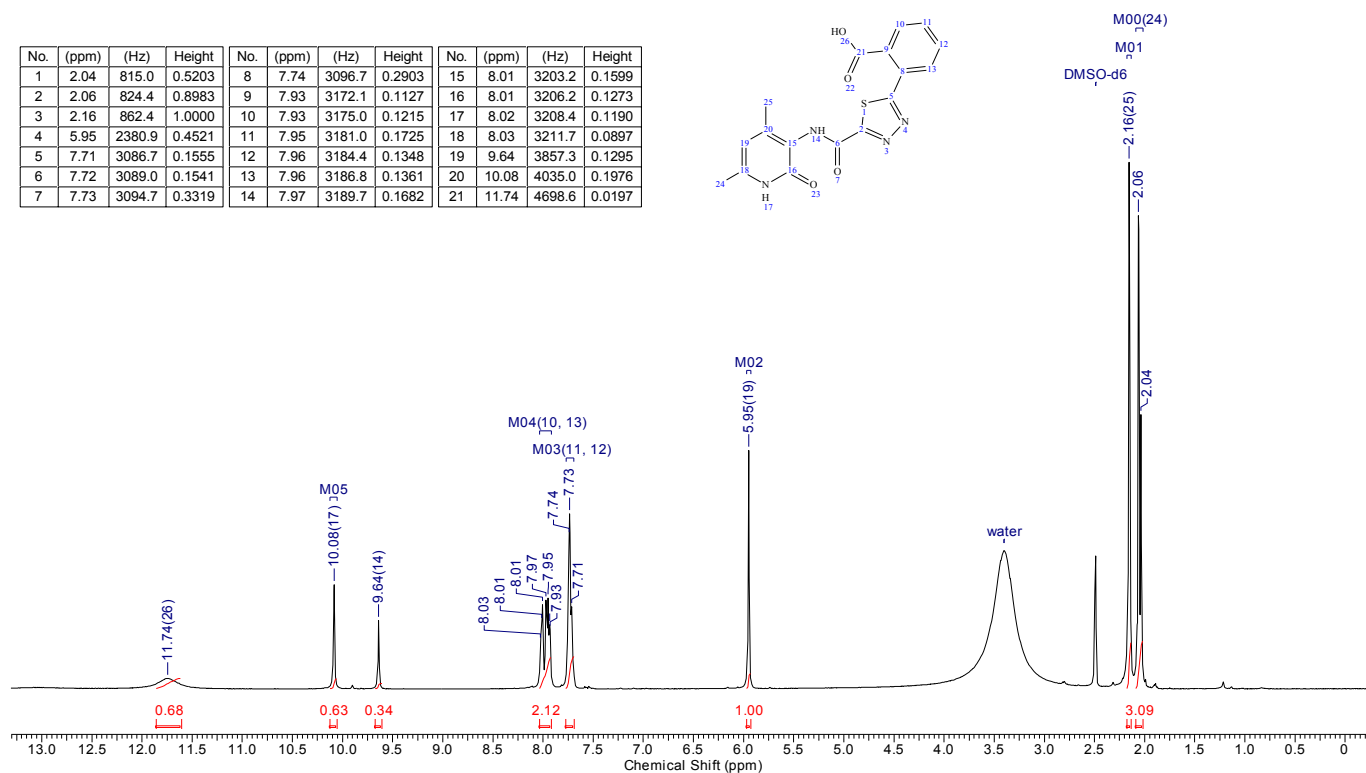

| No. | (ppm)  | (Hz)    | Height  | No. | (ppm)  | (Hz)    | Height  |
|-----|--------|---------|---------|-----|--------|---------|---------|
| 1   | 18.06  | 1817.3  | -0.2181 | 10  | 135.65 | 13647.8 | -0.1590 |
| 2   | 18.23  | 1834.1  | -0.2140 | 11  | 142.93 | 14380.3 | 0.1068  |
| 3   | 106.55 | 10720.3 | -0.1990 | 12  | 147.39 | 14828.9 | 0.0867  |
| 4   | 121.24 | 12198.2 | 0.0825  | 13  | 156.28 | 15723.8 | 0.0760  |
| 5   | 124.11 | 12486.6 | -0.1903 | 14  | 159.75 | 16073.3 | 0.1215  |
| 6   | 129.25 | 13004.6 | 0.1070  | 15  | 166.09 | 16710.3 | 0.1225  |
| 7   | 129.97 | 13077.1 | -0.1723 | 16  | 167.71 | 16873.6 | 0.0969  |
| 8   | 131.73 | 13254.1 | -0.1881 | 17  | 170.35 | 17139.1 | 0.0602  |
| 9   | 132.52 | 13333.5 | 0.0985  |     |        |         |         |

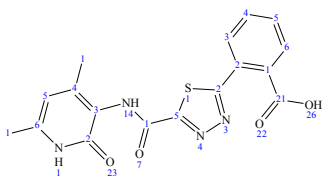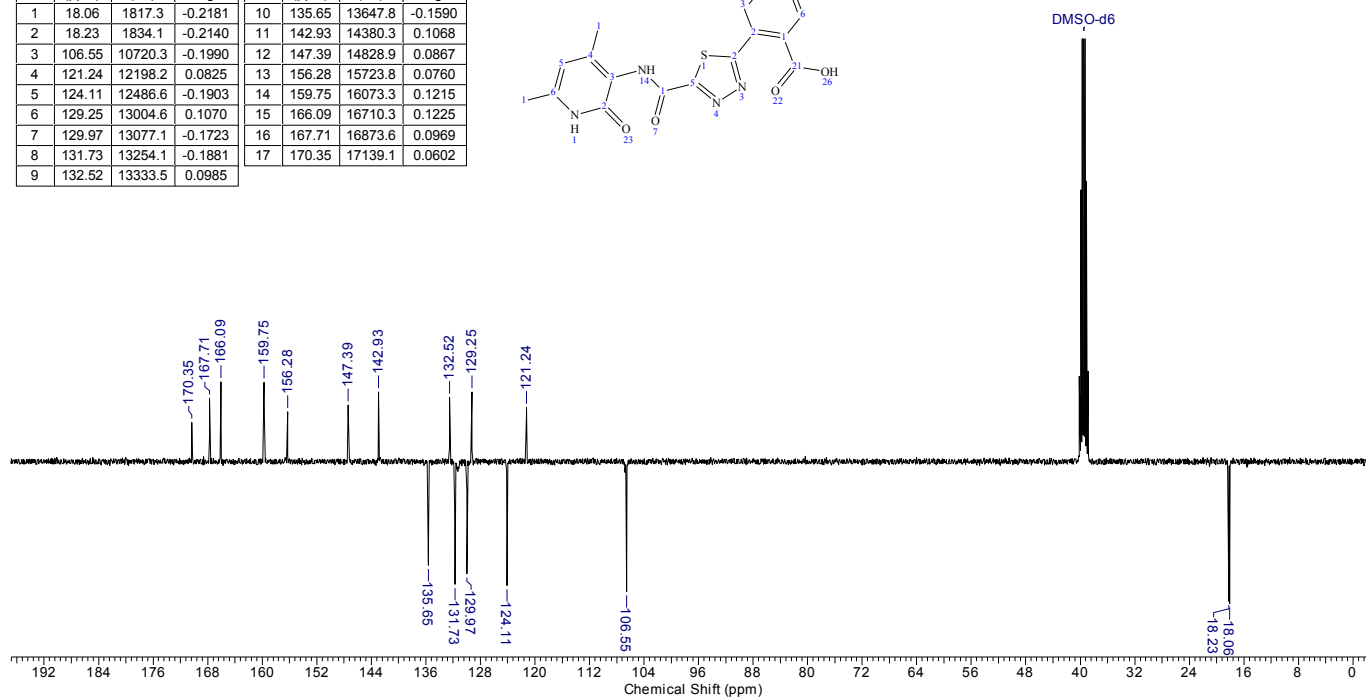

$^1\text{H}$  (400 MHz,  $\text{DMSO-}d_6$ ) and  $^{13}\text{C}$  (100 MHz,  $\text{DMSO-}d_6$ ) NMR Spectra of **9a**

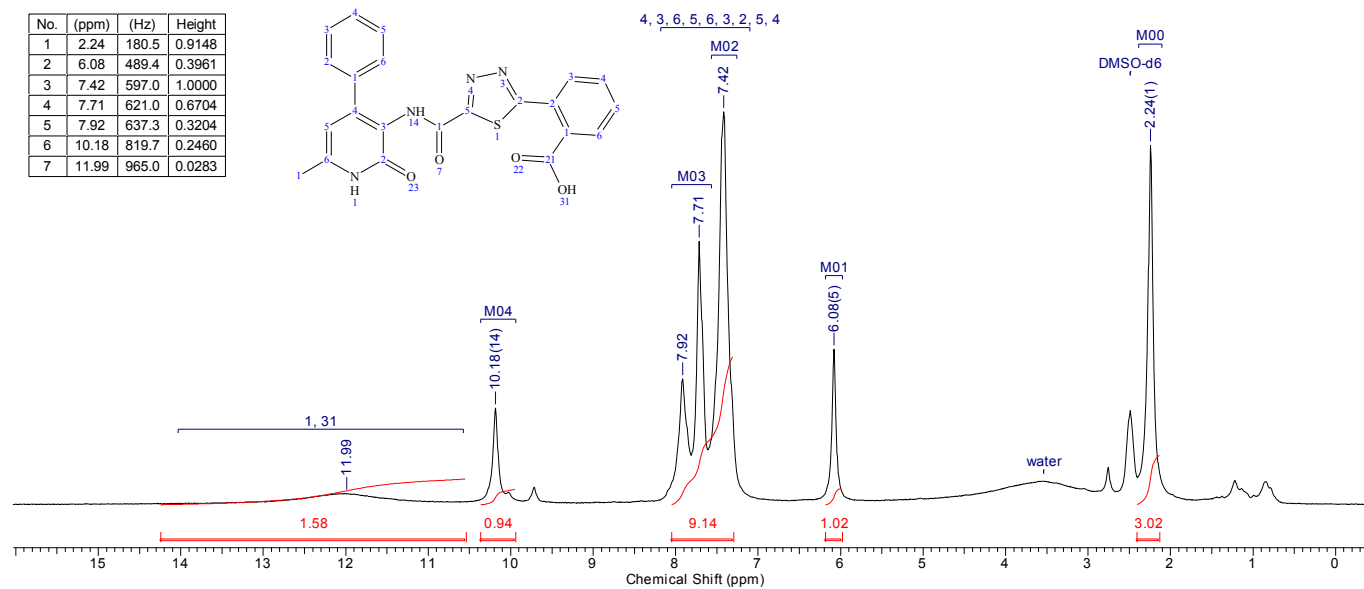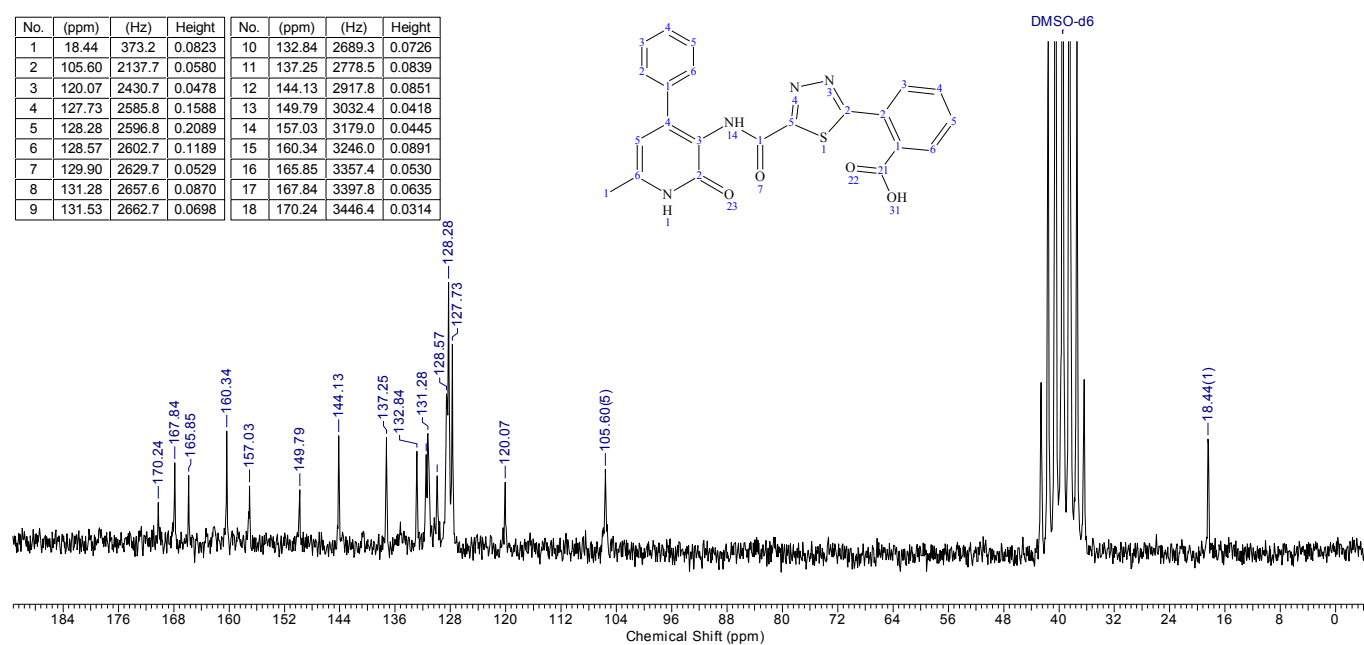

$^1\text{H}$  (80 MHz,  $\text{DMSO}-d_6$ ) and  $^{13}\text{C}$  (21 MHz,  $\text{DMSO}-d_6$ ) NMR Spectra of **9b**

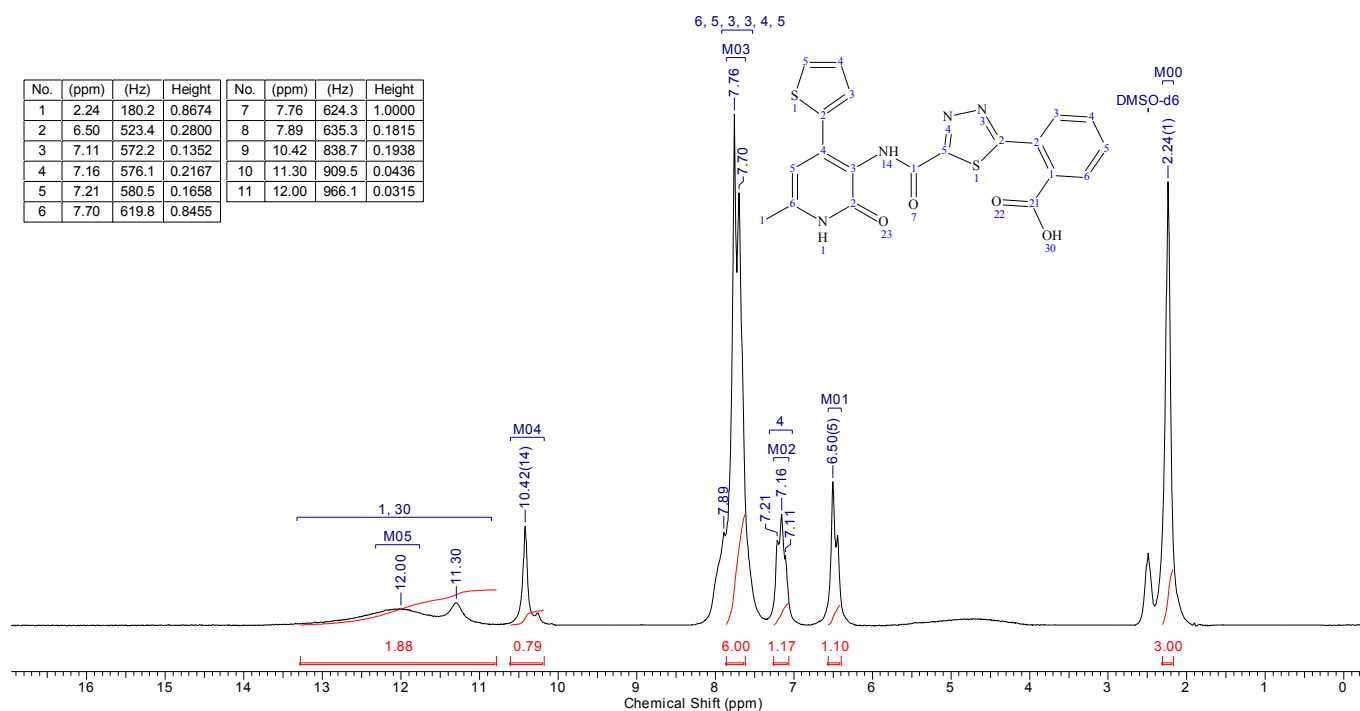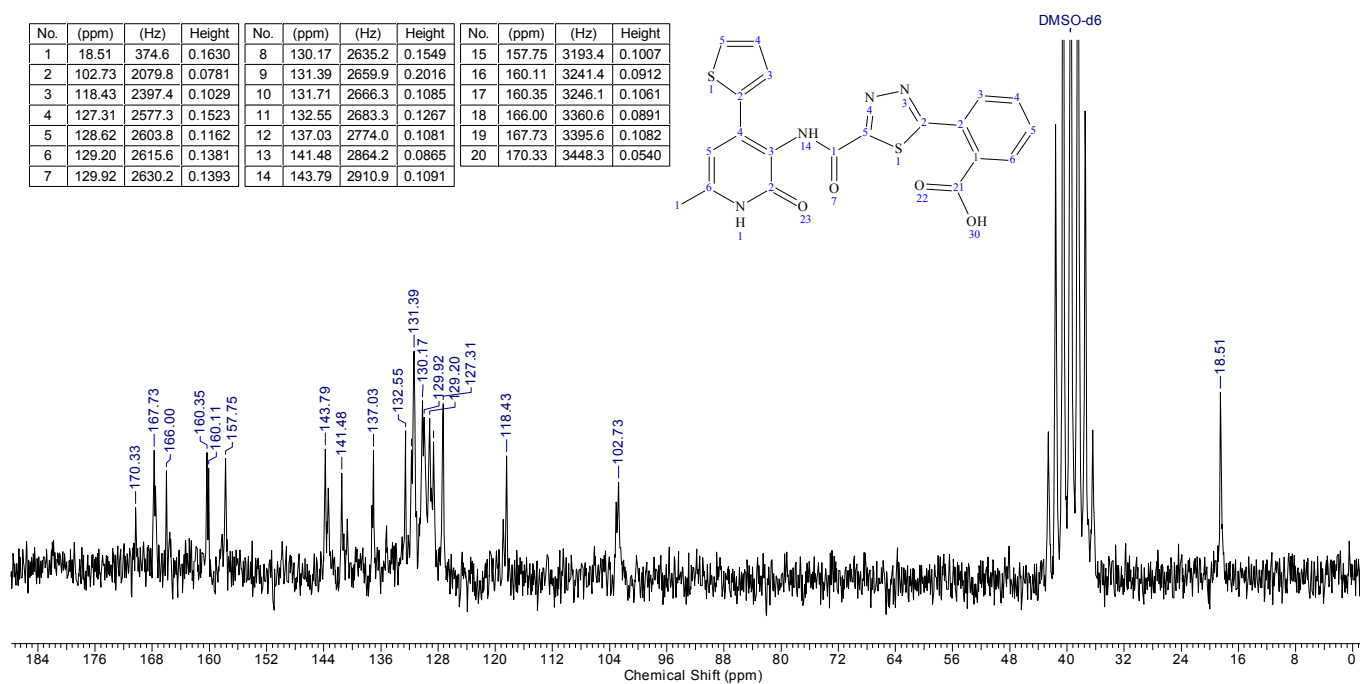

$^1\text{H}$  (80 MHz,  $\text{DMSO}-d_6$ ) and  $^{13}\text{C}$  (21 MHz,  $\text{DMSO}-d_6$ ) NMR Spectra of **9c**

## Copies of MS Spectra of Products

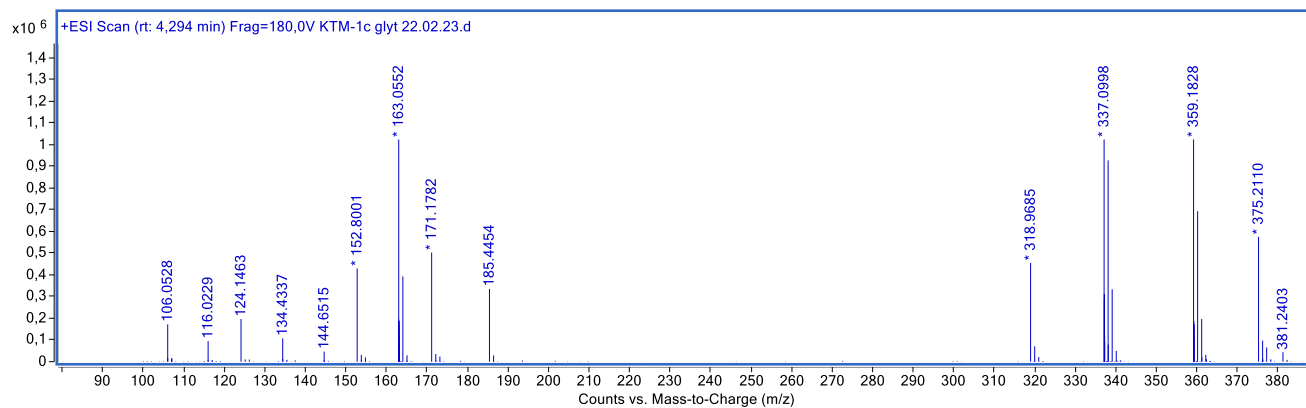

Mass spectrum ( LC/Q-TOF) of (7a)

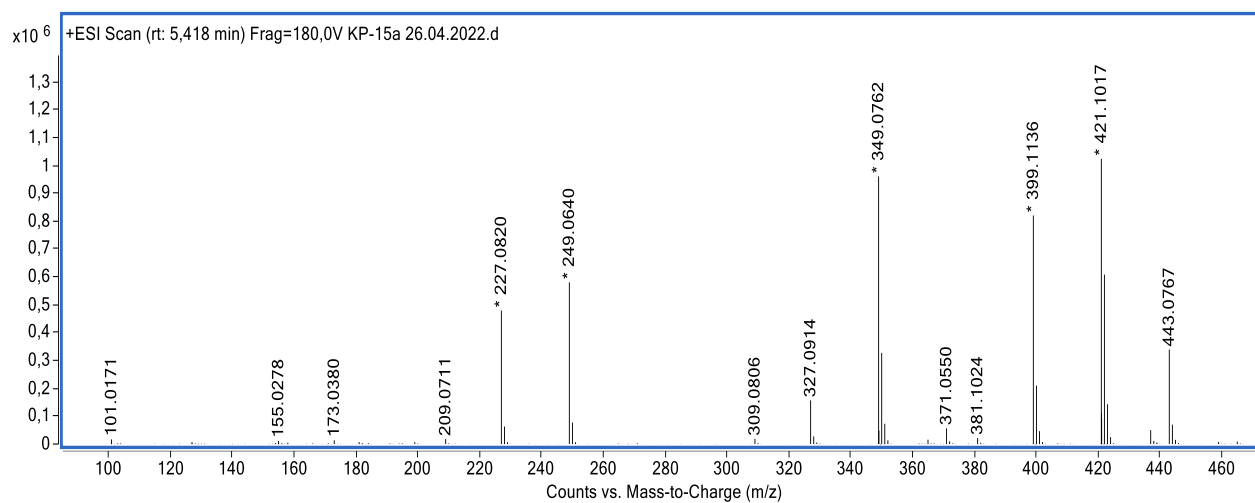

Mass spectrum ( LC/Q-TOF) of (7b)

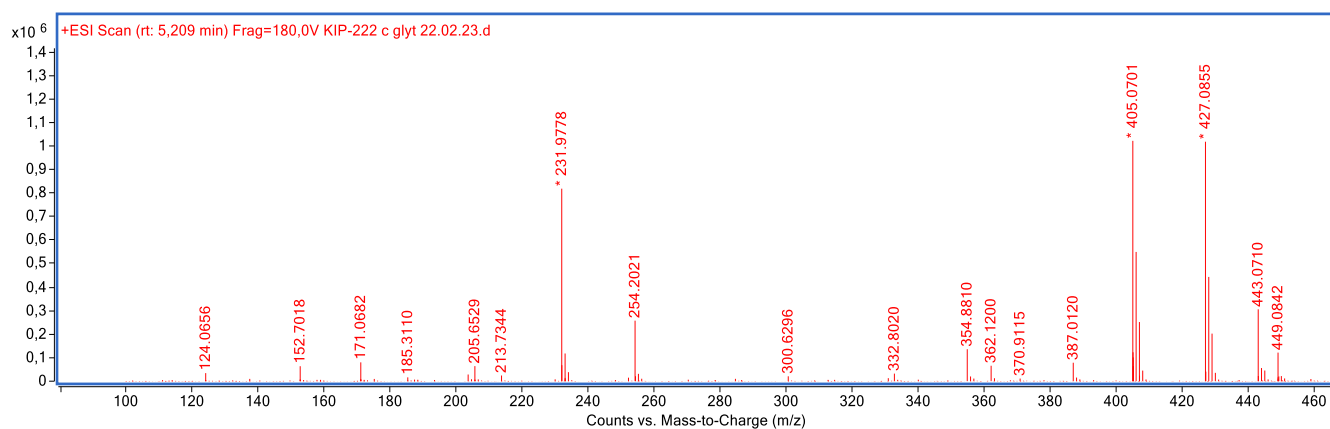

Mass spectrum ( LC/Q-TOF) of (7c)

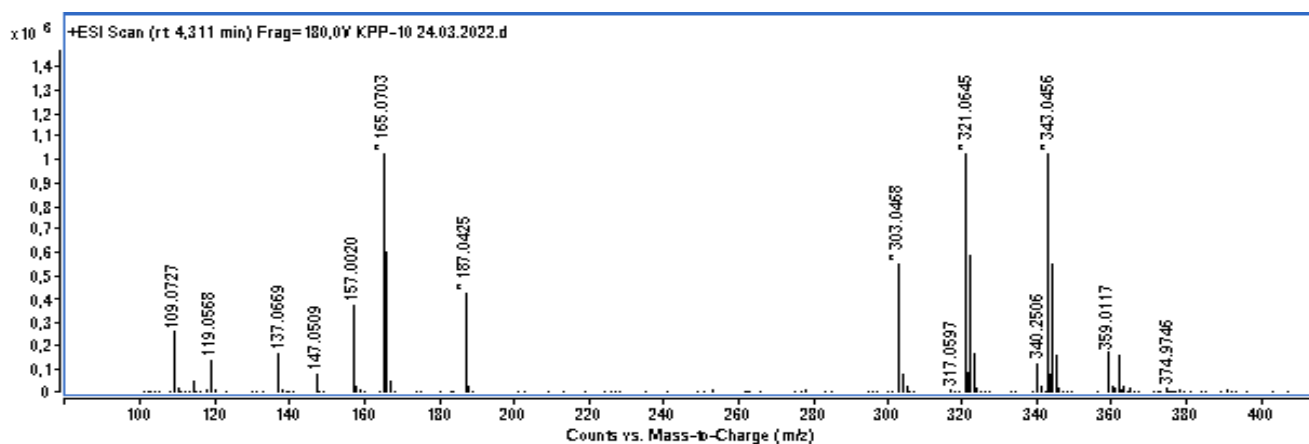

Mass spectrum ( LC/Q-TOF) of (8a)

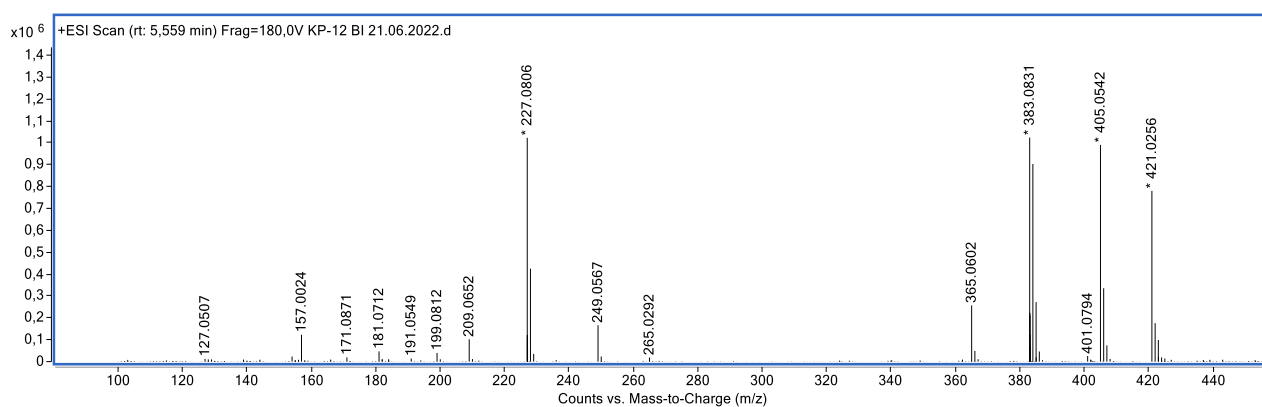

Mass spectrum ( LC/Q-TOF) of (8b)

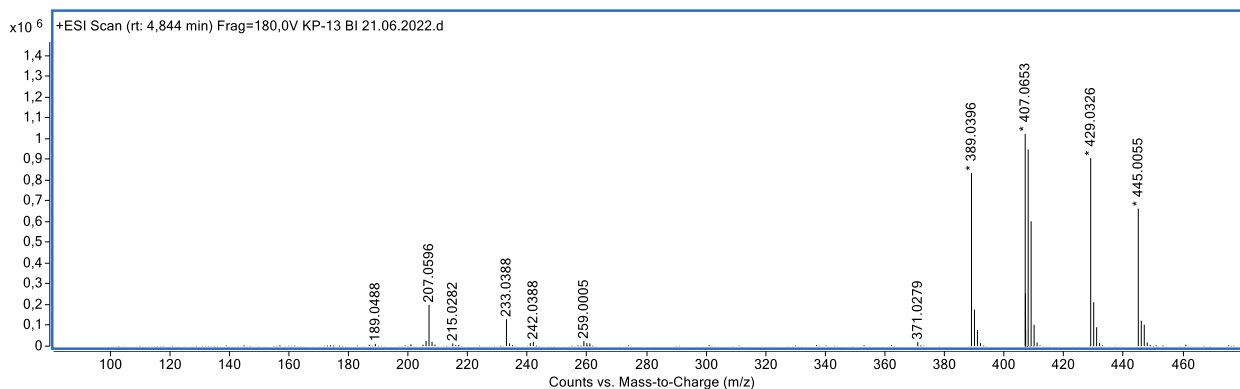

Mass spectrum ( LC/Q-TOF) of (8c)



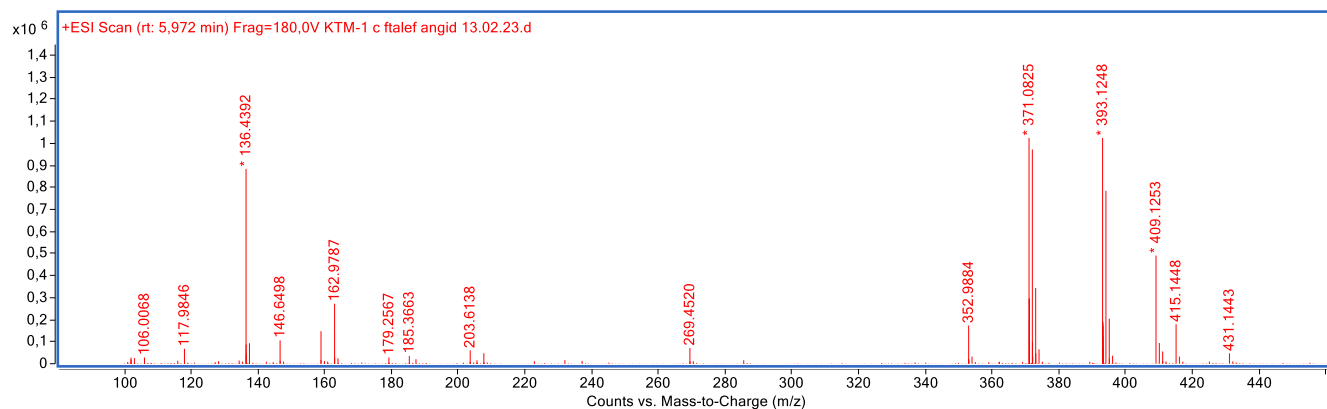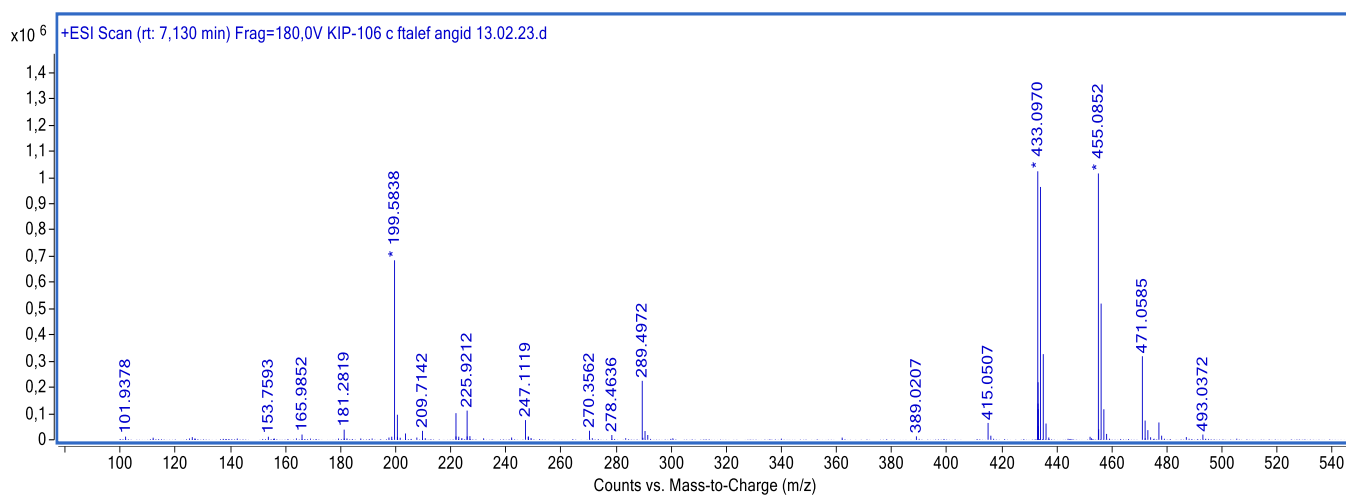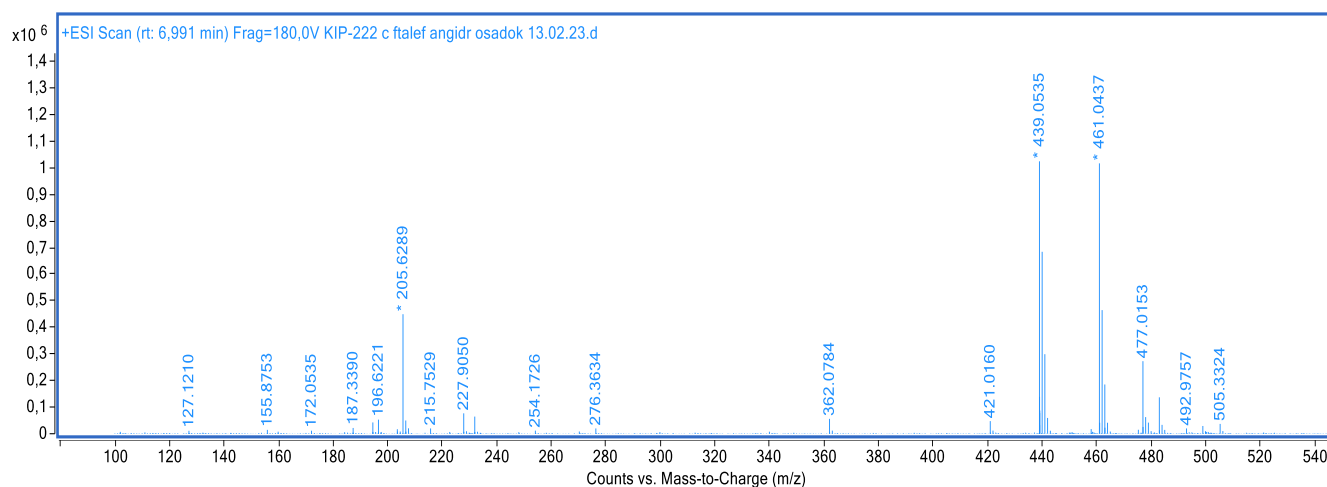

**Table S1.** Complexes between synthesized derivatives **5(a-c)**, **7-9(a-c)** and active sites of proteins (PDB: 5NN8, 3W37, 2QV4)

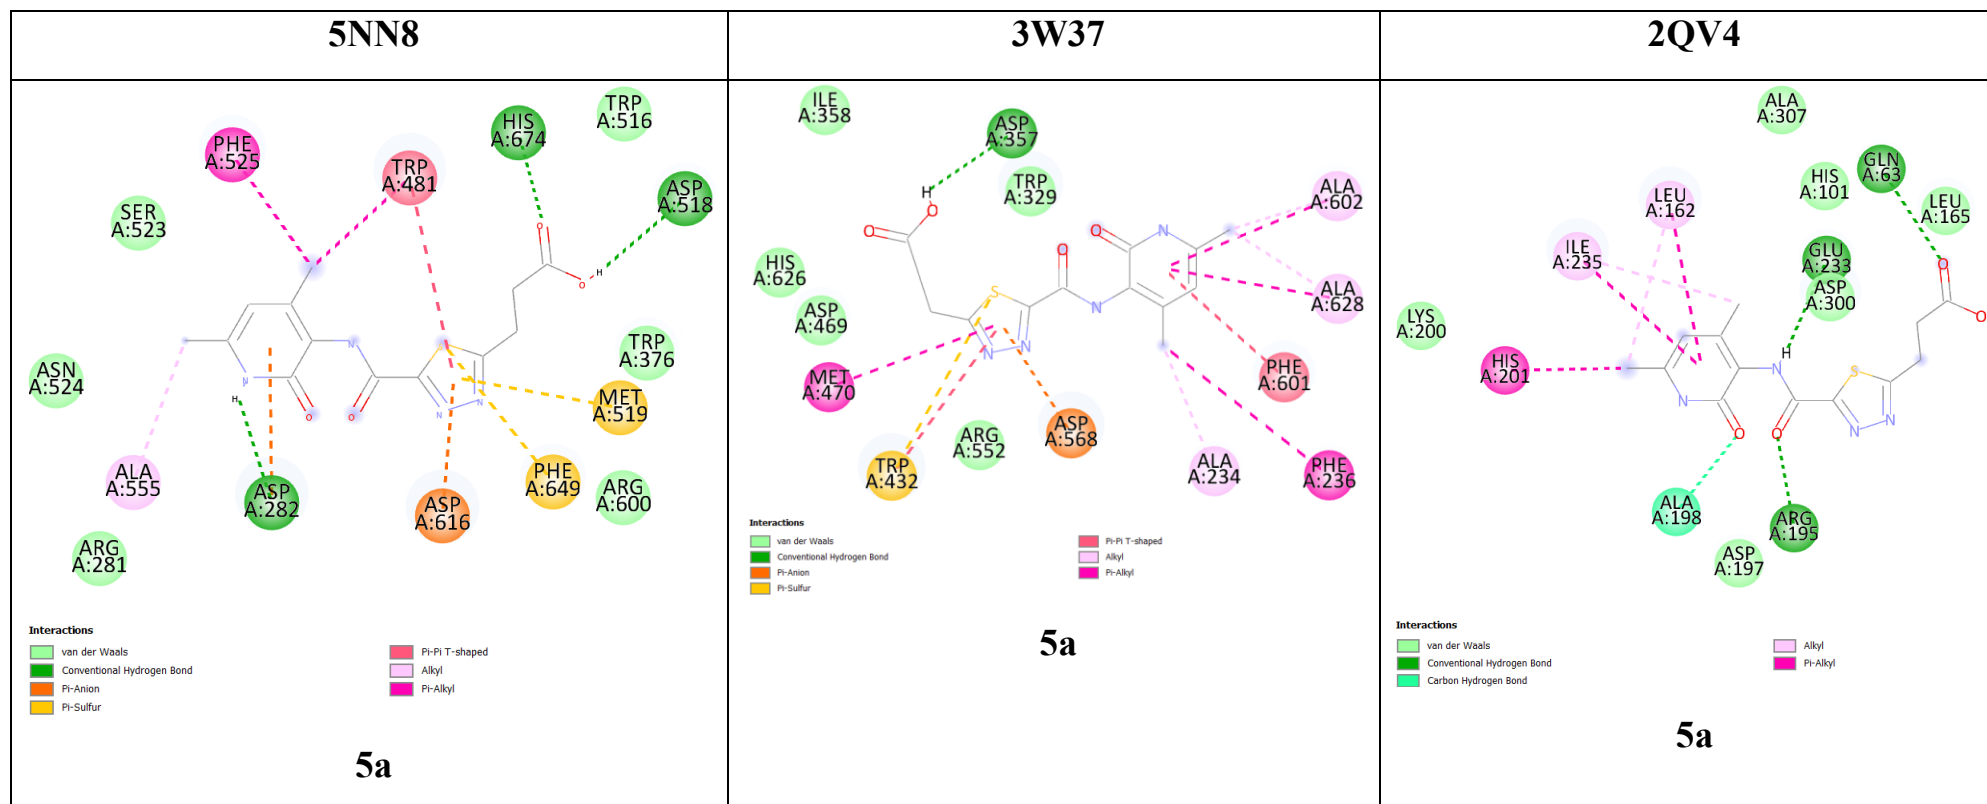

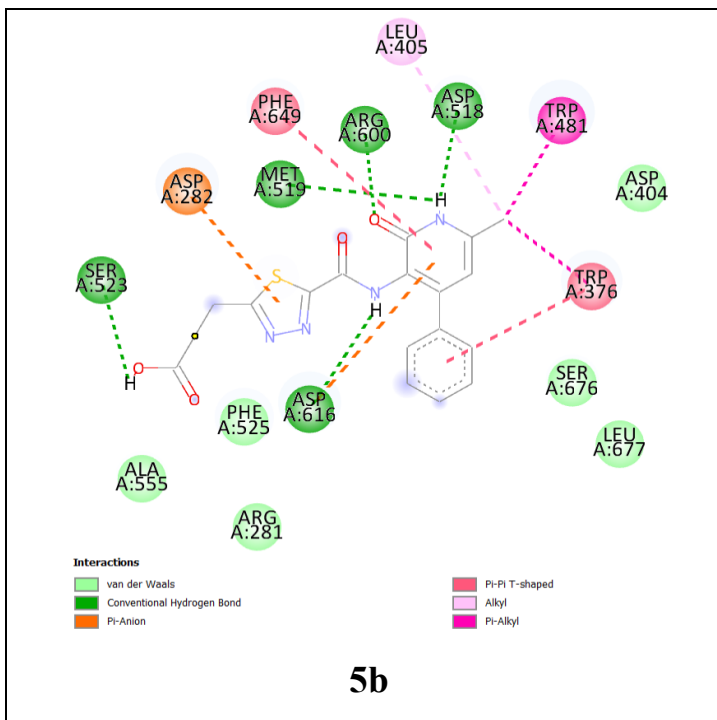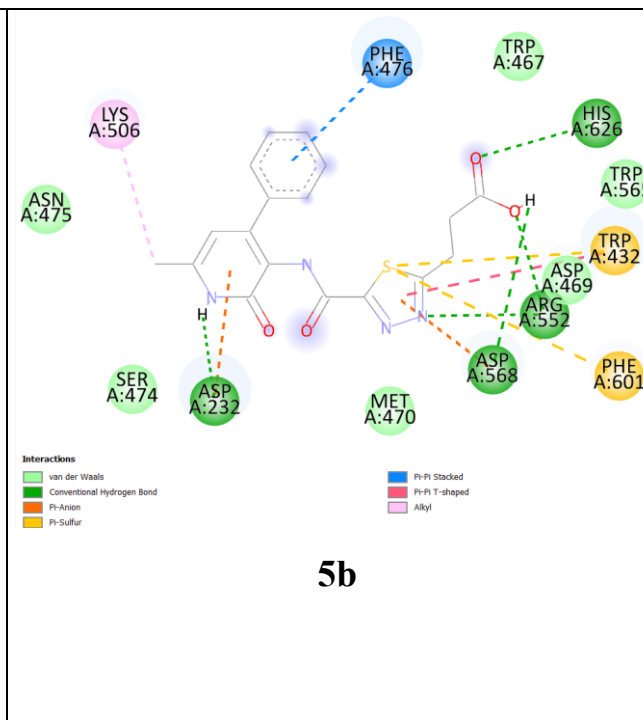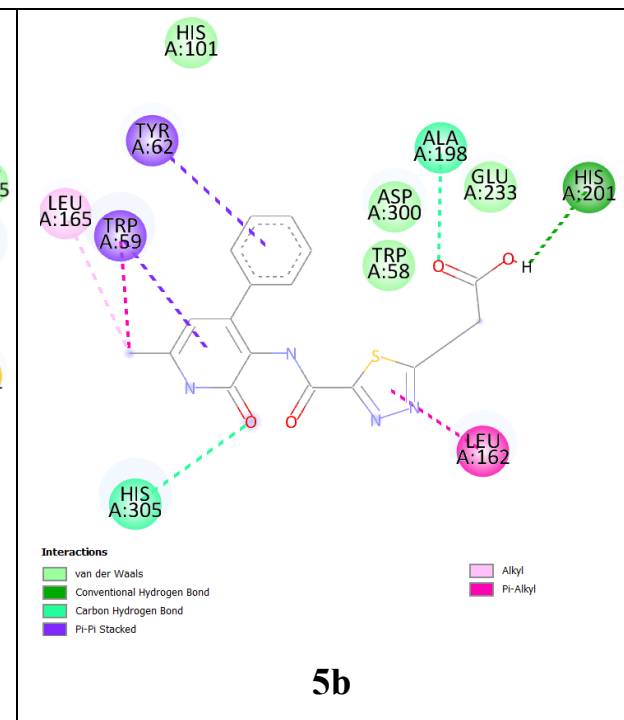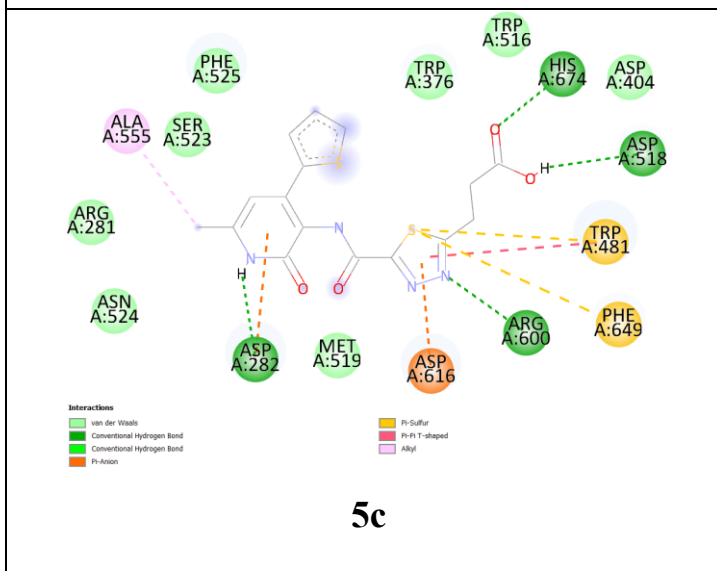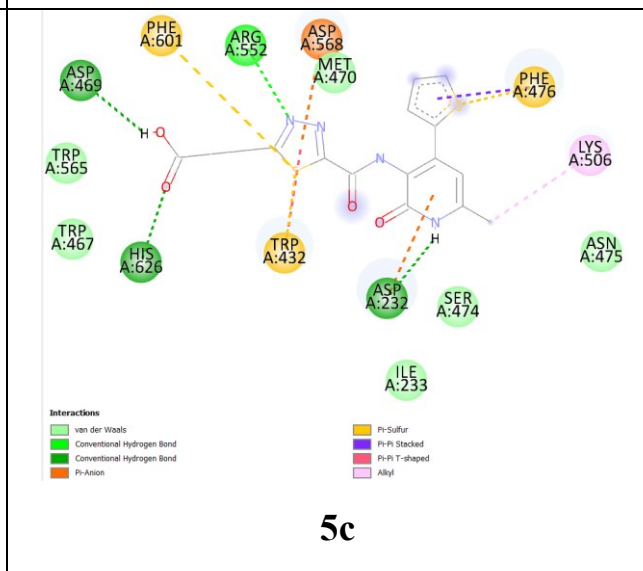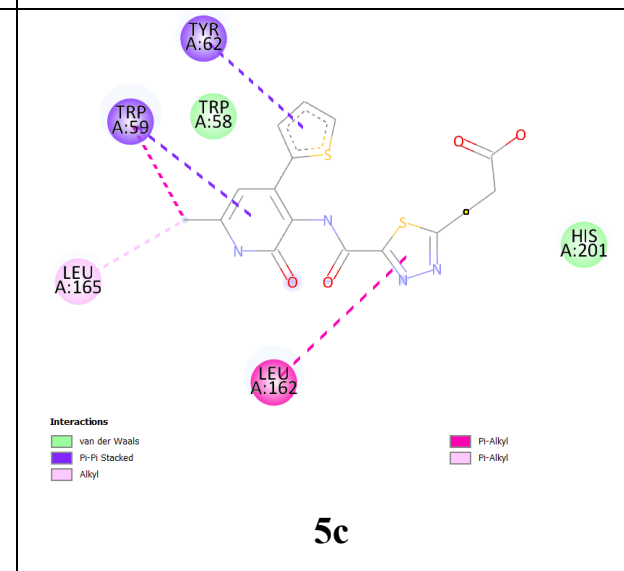

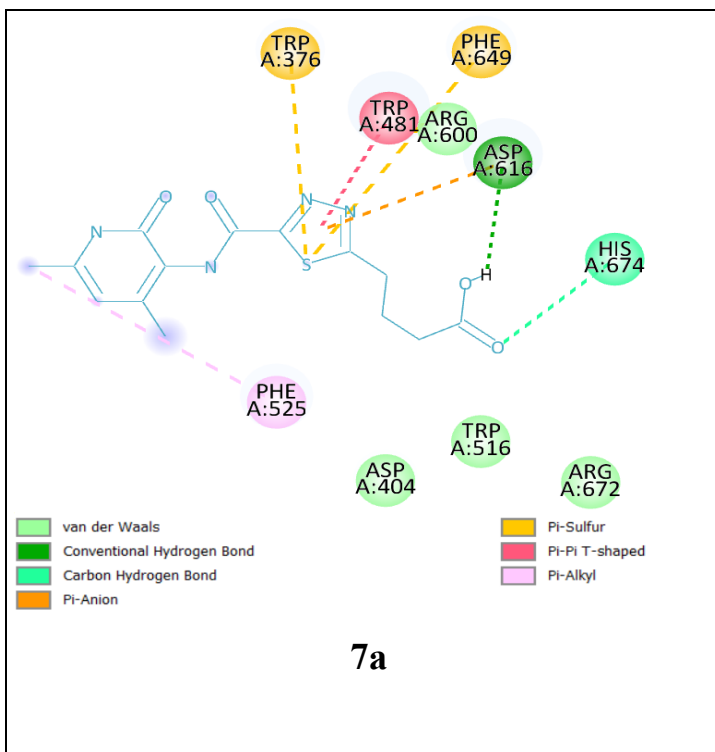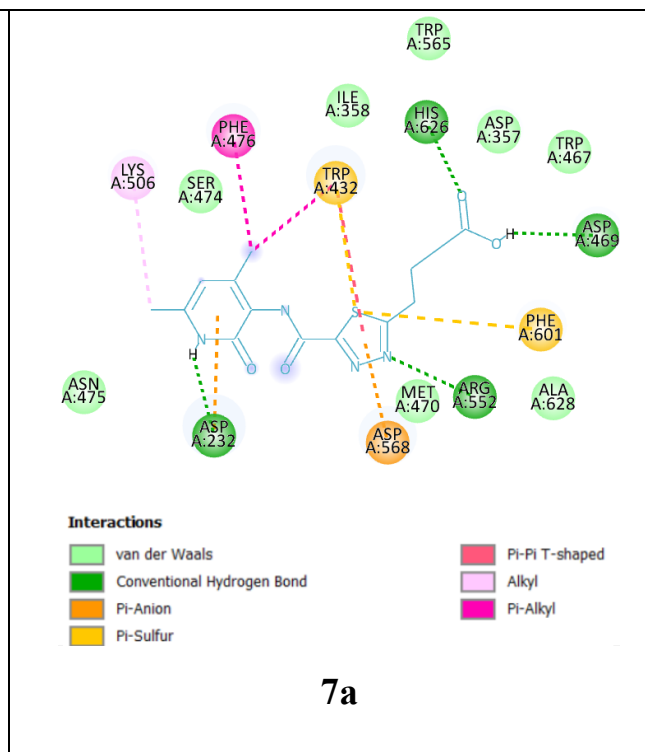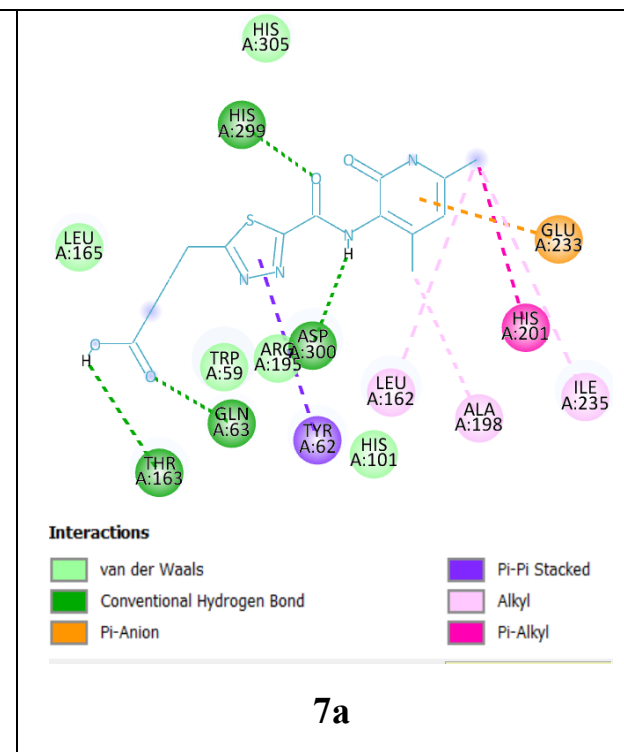

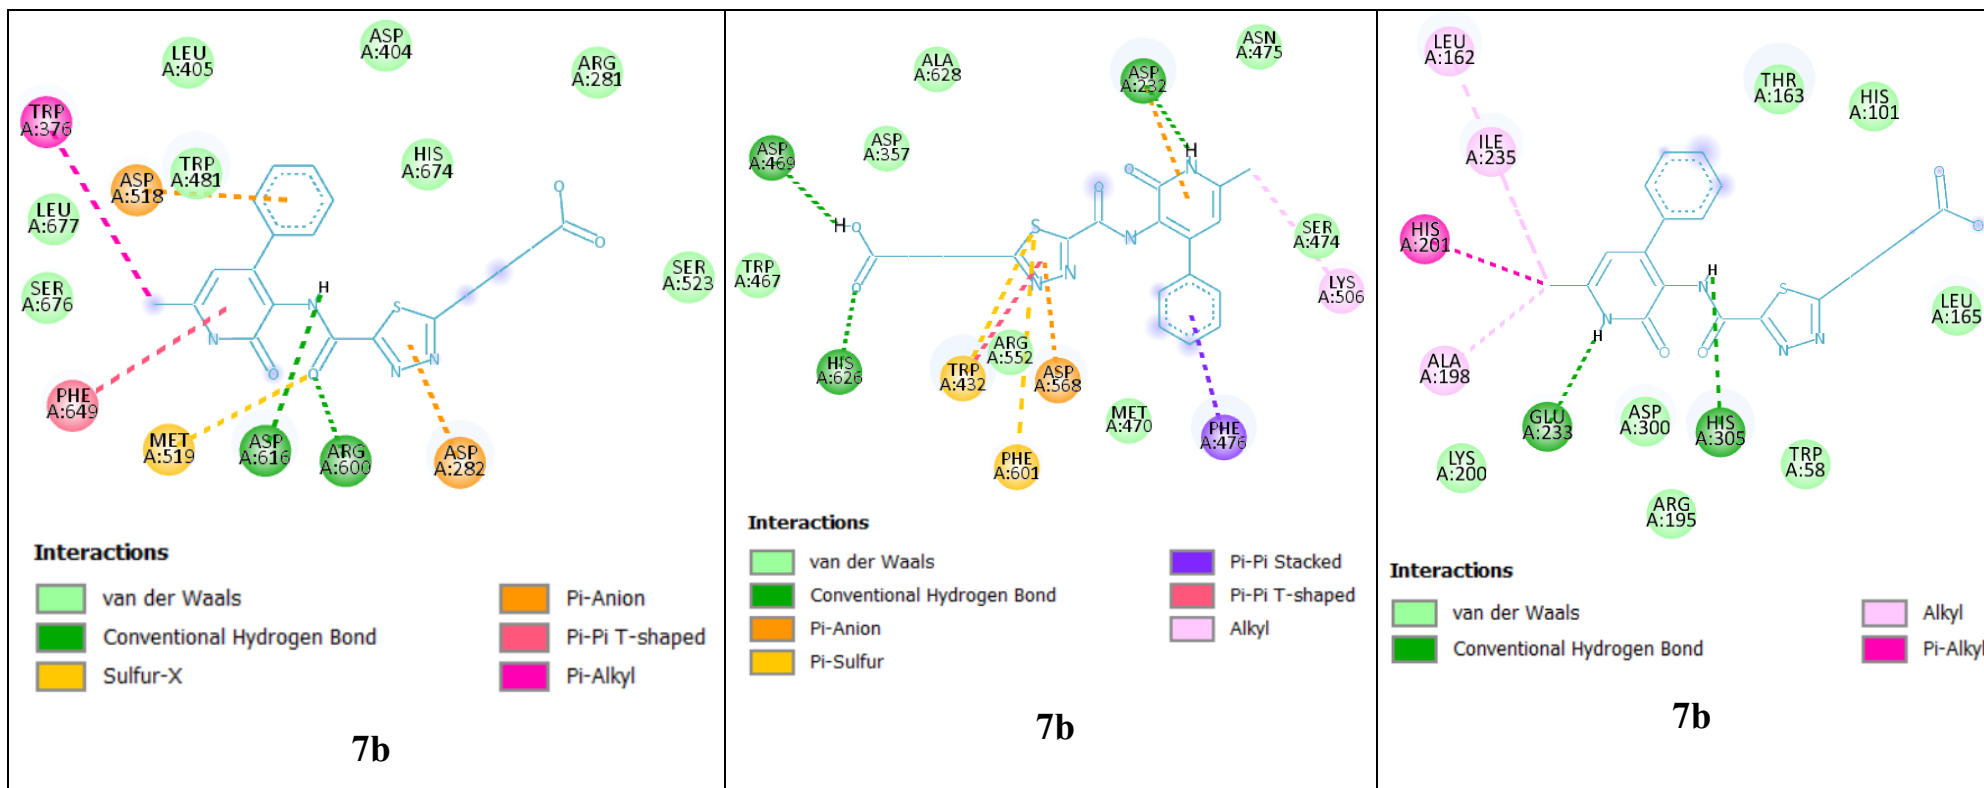

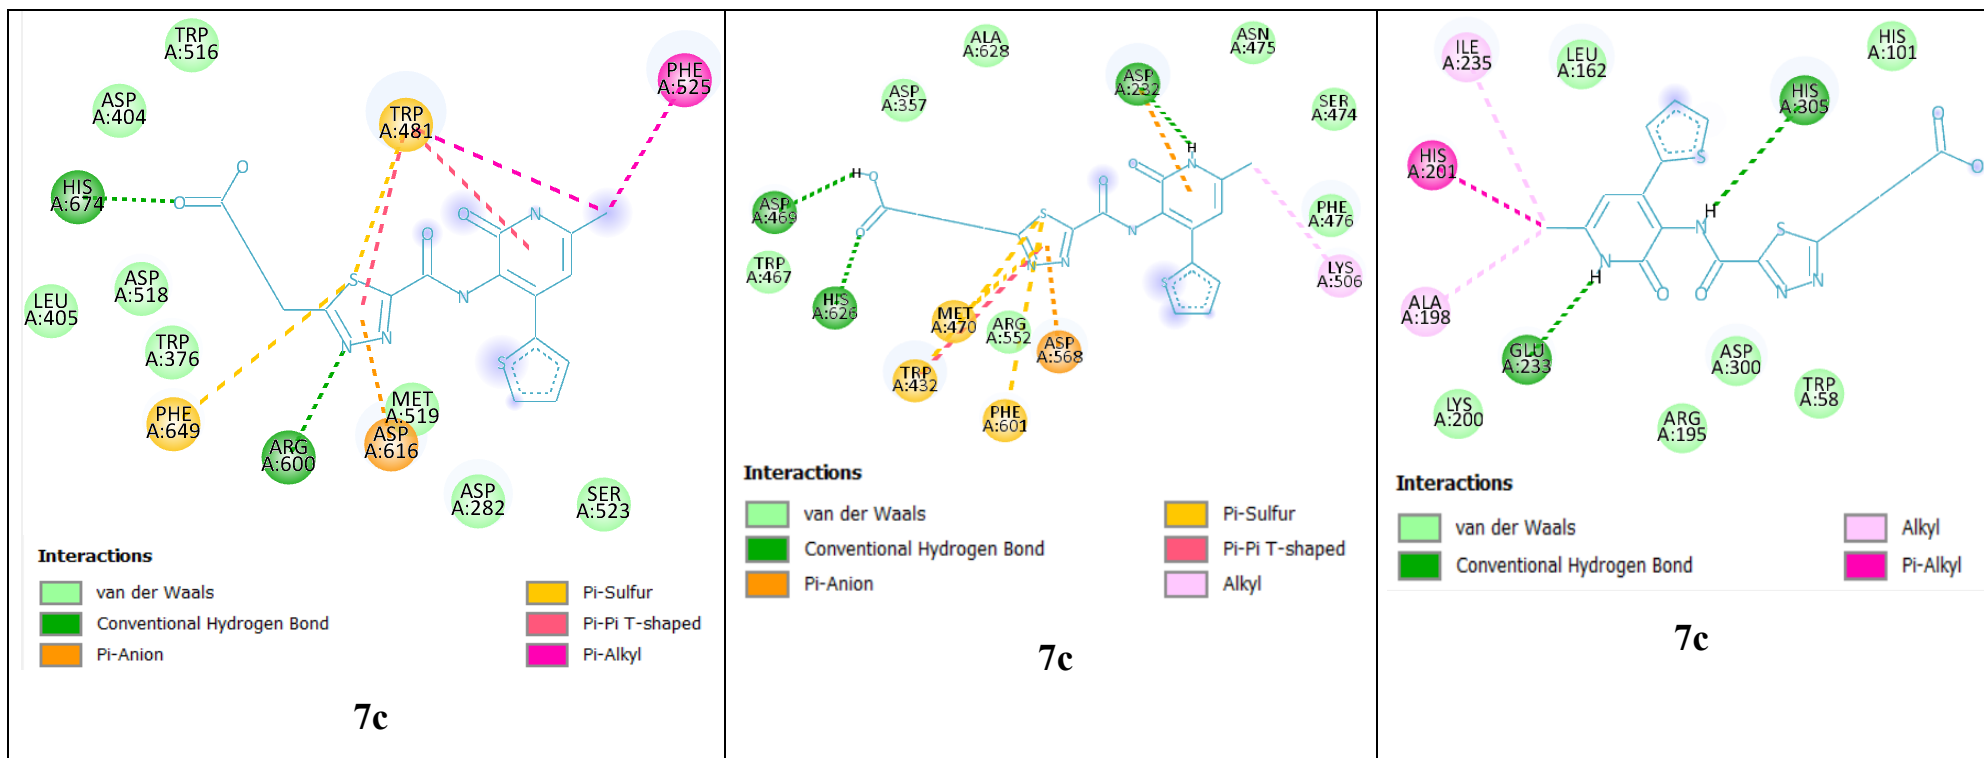

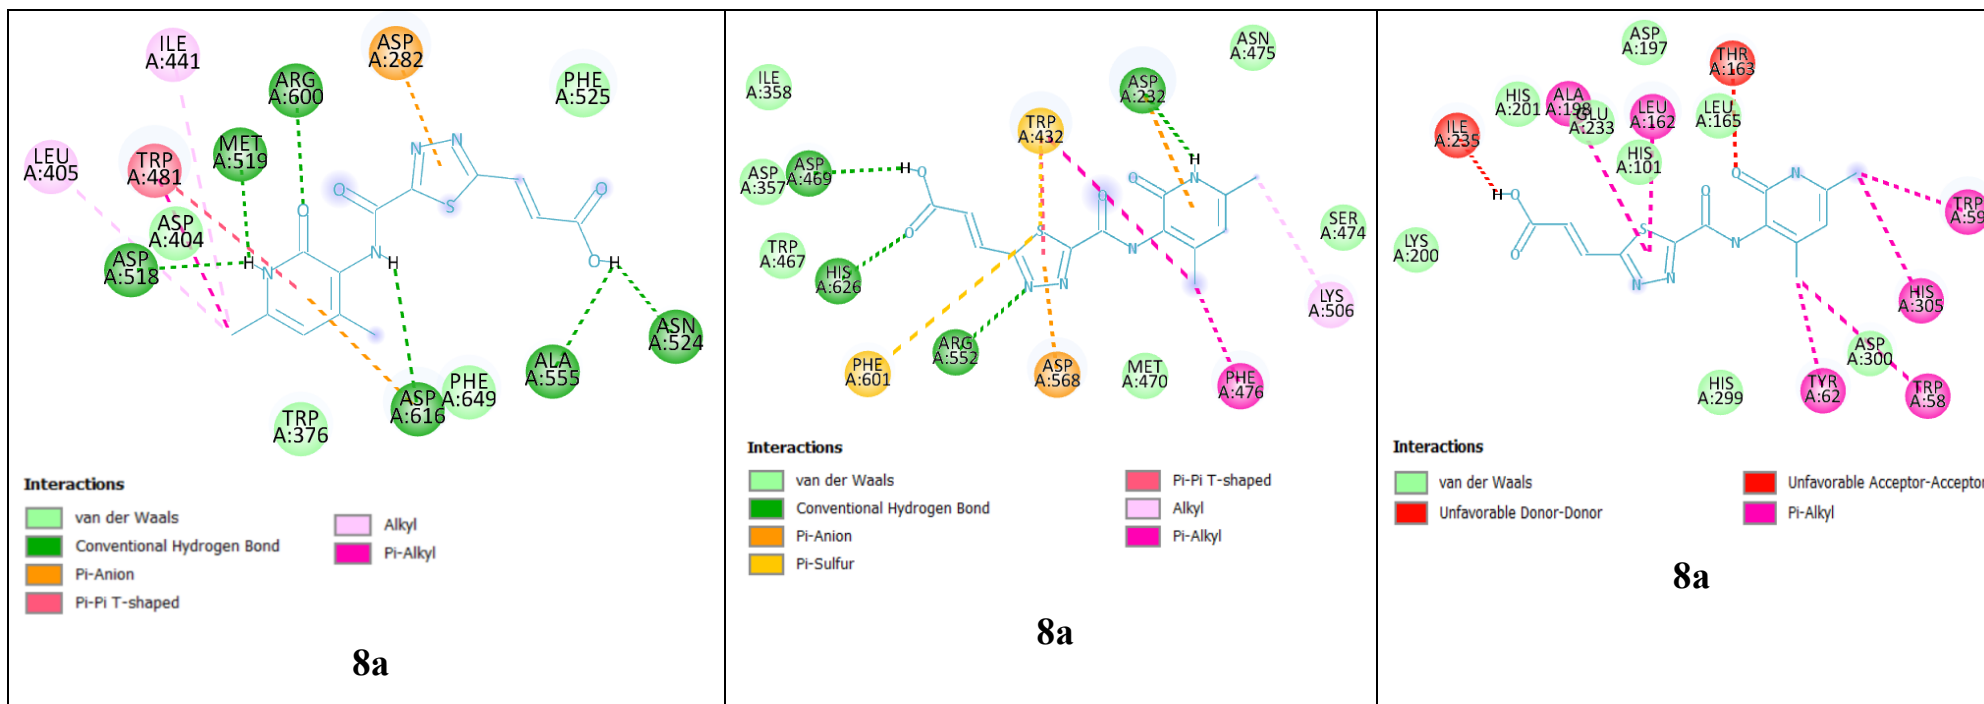

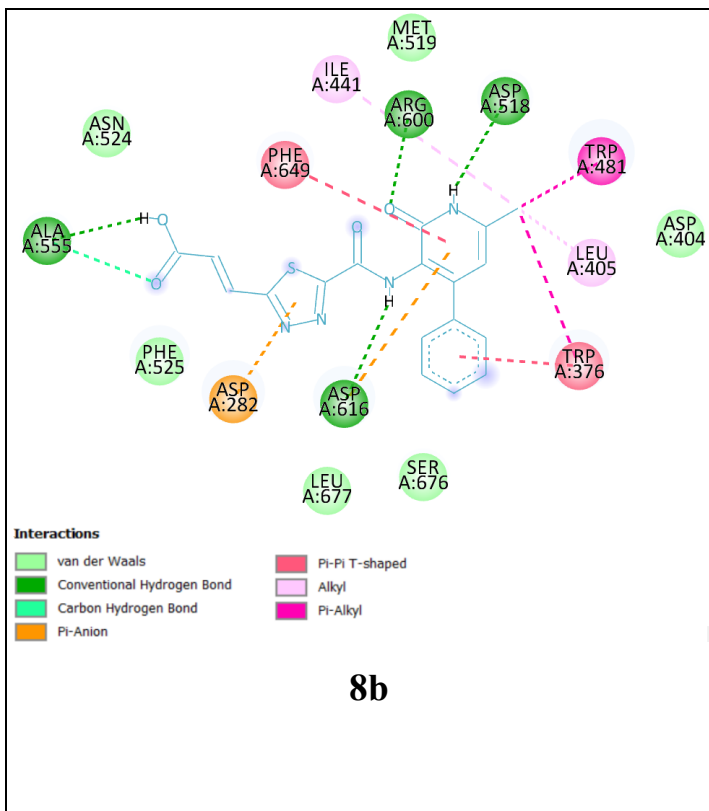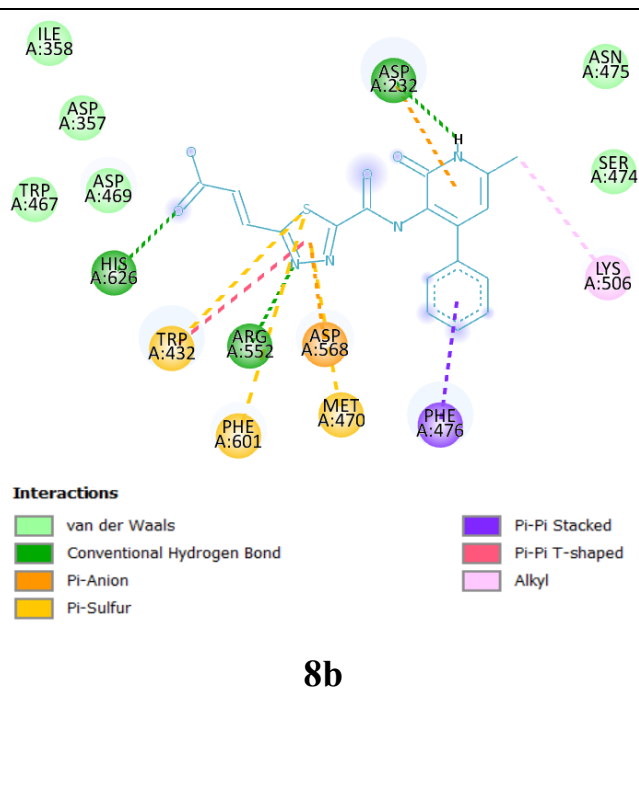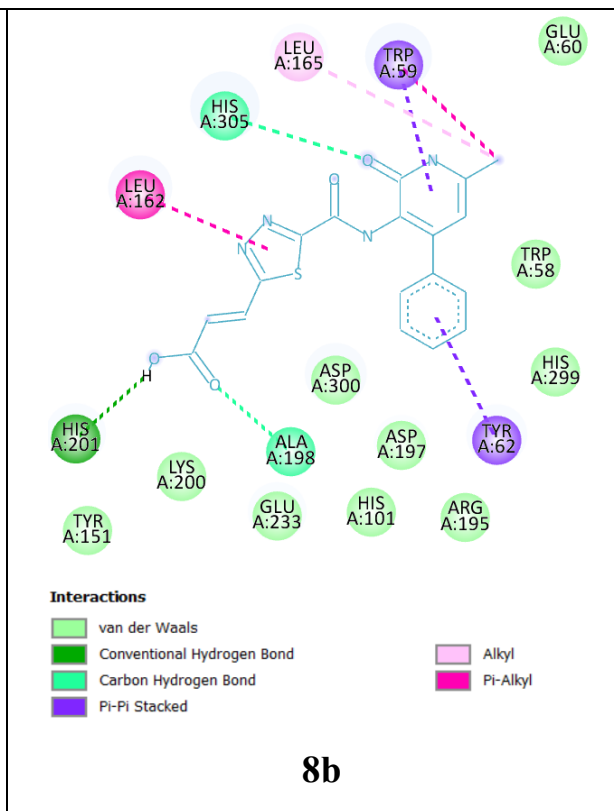



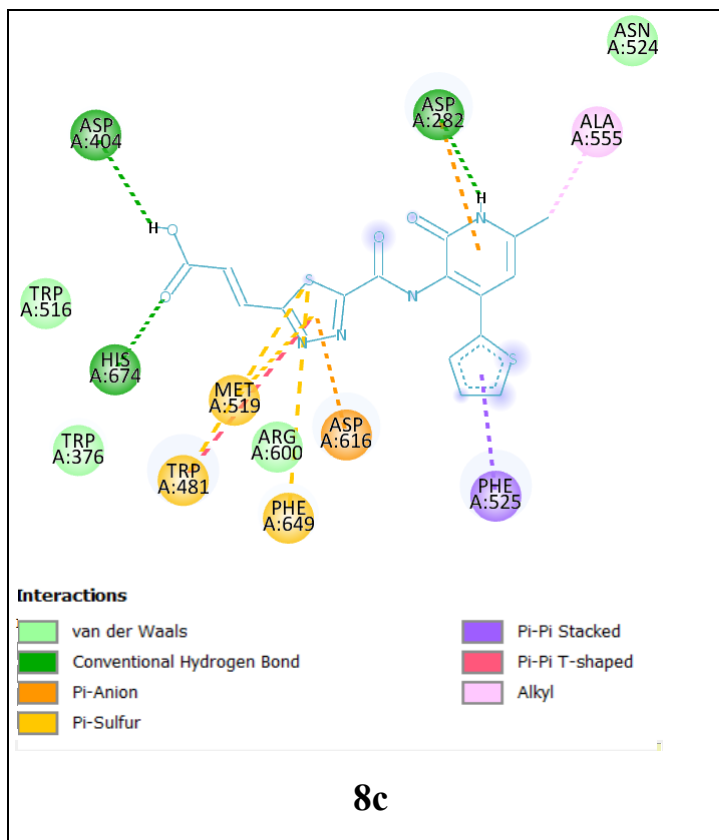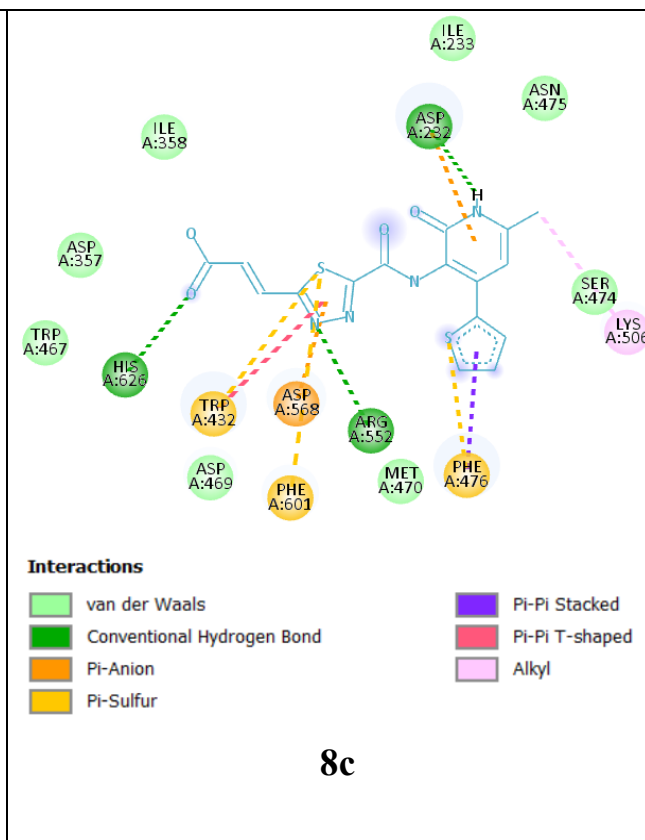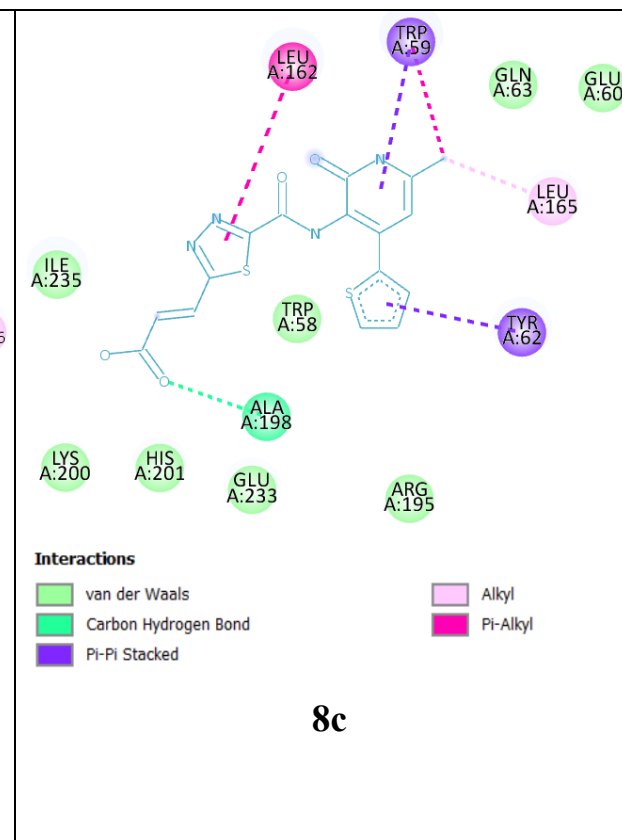

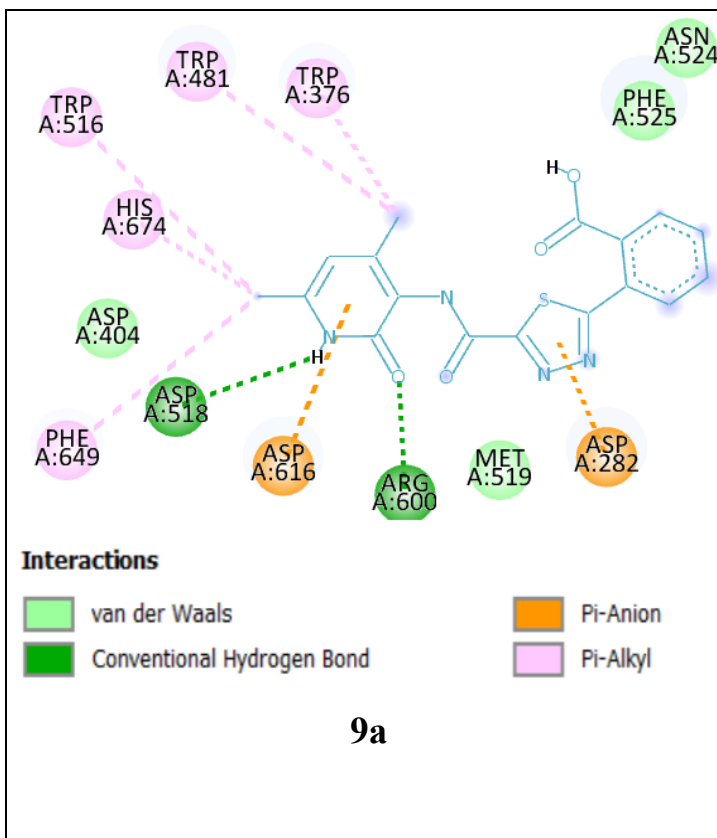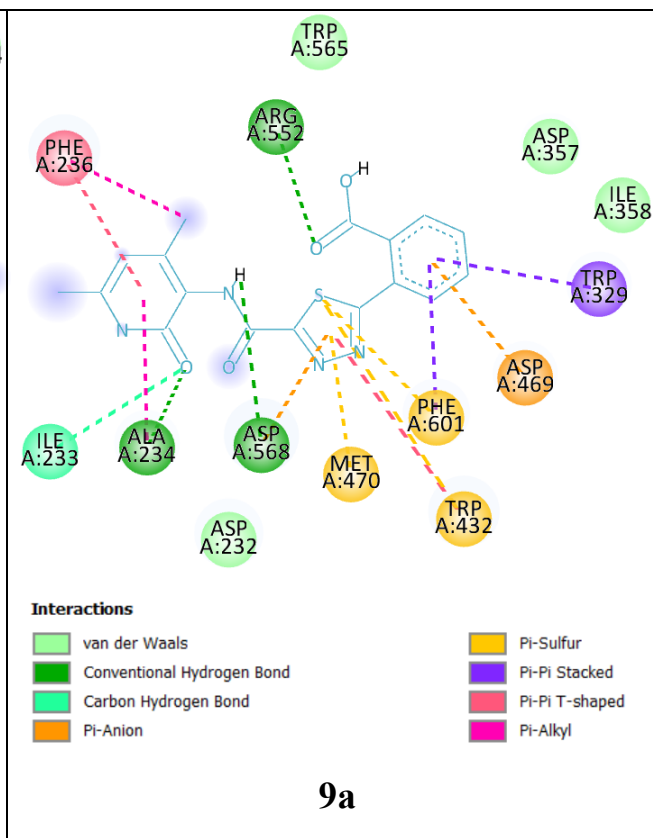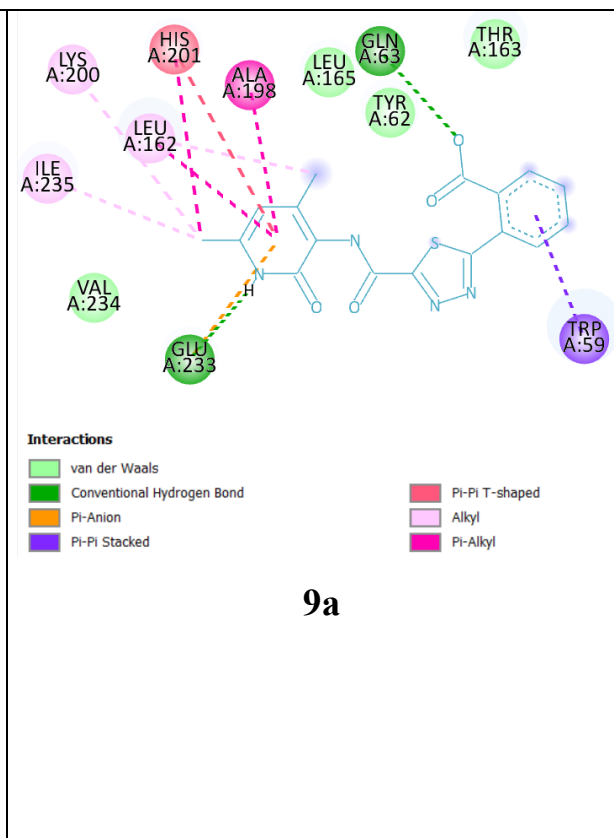

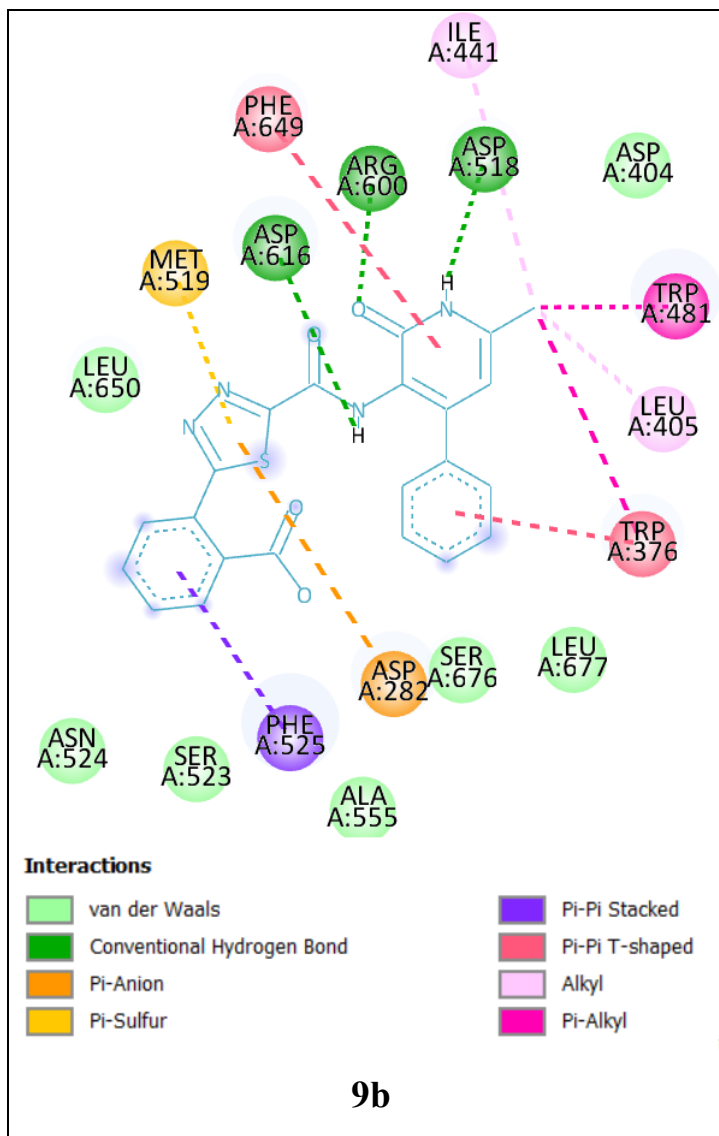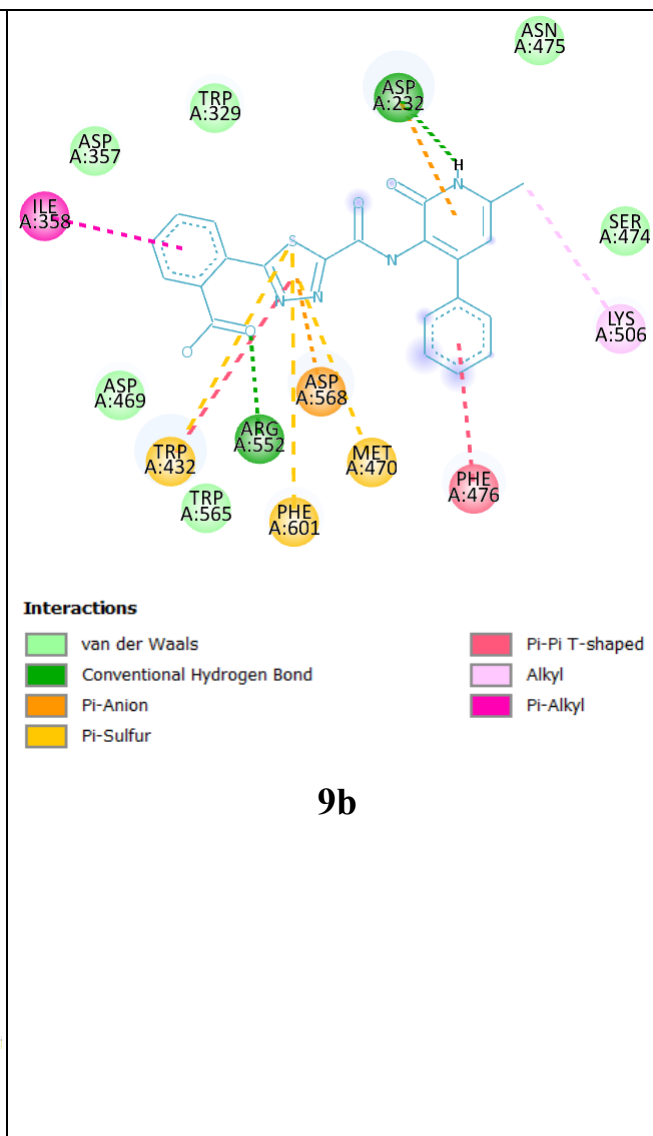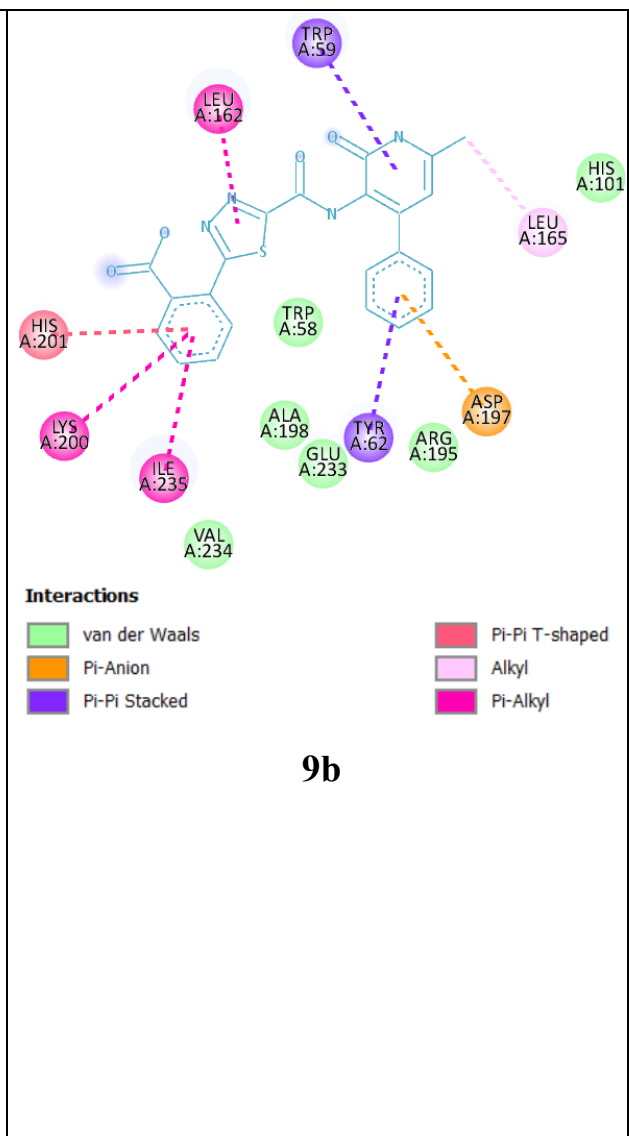

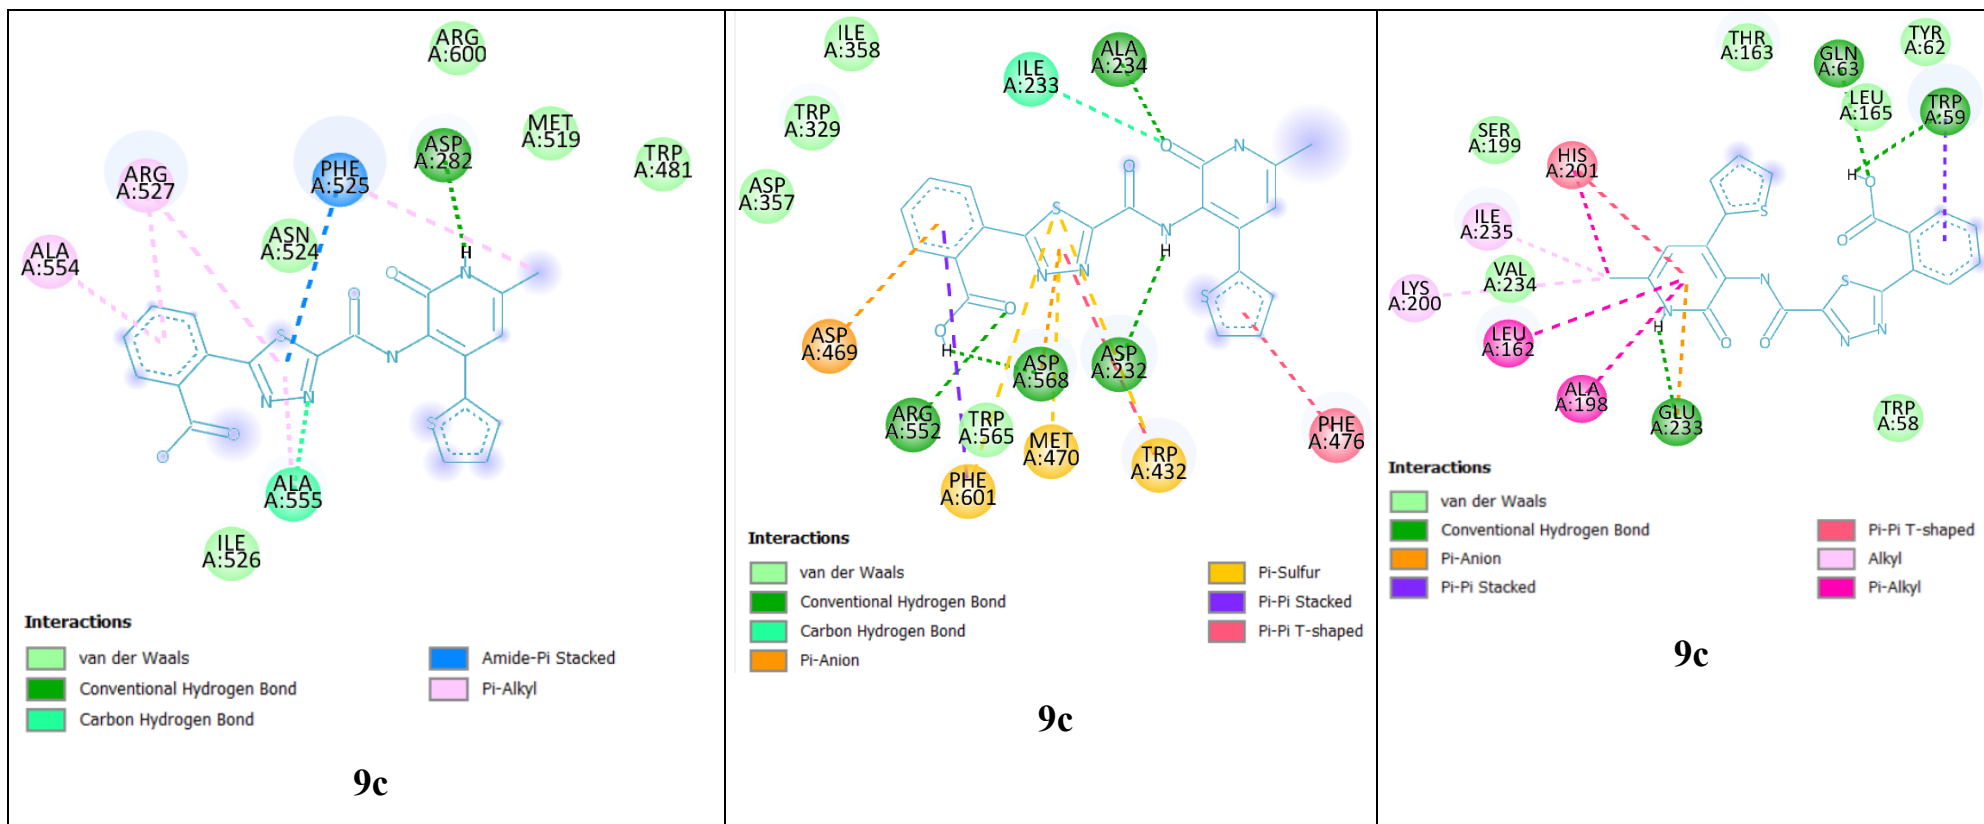

**Table S2.** Basic amino acid interactions and H-bonds

| Compound | Receptor | H-bond                                 | Residual Amino acid Interactions                                                                                                                      |                                                                 |
|----------|----------|----------------------------------------|-------------------------------------------------------------------------------------------------------------------------------------------------------|-----------------------------------------------------------------|
|          |          |                                        | Pi-Sulfur/ Pi-Anion/Pi-Cation/Pi-Pi Stacked/ Pi-sigma/Pi-Pi T-shaped/Pi-Alkyl/ Alkyl/Amide-Pi Stacked/Pis interactions/Salt Bridge/ Attactive Charge/ | Van-der Walls interactions                                      |
| 8a       | 3W37     | ASP357                                 | ALA234, ALA602, ALA628, PHE601, PHE236, ASP568, MET470, TRP432.                                                                                       | ARG552, HIS626, ASP469, ILE358, TRP329.                         |
| 8b       |          | ASP232, ASP568, ARG552, HIS626         | TRP432, PHE601, PHE476, LYS506.                                                                                                                       | ASP469, TRP565, TRP467, MET470, SER474, ASN475.                 |
| 8c       |          | ASP469, ASP232, ARG552, HIS626         | TRP432, PHE601, ASP568, PHE476, LYS506.                                                                                                               | TRP565, TRP467, MET470, SER474.                                 |
| 8a       | 2QV4     | HIS299, GLU233, ILE235, LYS200, VAL234 | ALA198.                                                                                                                                               | ARG195, ASP300, SER199, HIS201, HIS101.                         |
| 8b       |          | HIS201, HIS305, ALA198                 | LEU162, TYR62, LEU165, TRP59.                                                                                                                         | ASP300, TRP58, GLU233.                                          |
| 8c       |          | HIS305                                 | LEU162, TYR62, LEU165, TRP59, TRP58.                                                                                                                  | ASP300, HIS201.                                                 |
| 8a       | 5NN8     | ASP282; HIS674; ASP518                 | PHE525; ALA555; ASP282; ASP616; PHE646; MET519; TRP481.                                                                                               | SER523; ASN524; ARG281; ARG600; TRP376; TRP516.                 |
| 8b       |          | SER523; ASP616; MET519; ARG600; ASP518 | ASP282; ASP616; TRP376; TRP481; PHE649; LEU405.                                                                                                       | ALA555; PHE525; ARG281; SER676; LEU677.                         |
| 8c       |          | ASP282; ARG600; ASP518; HIS674         | ALA555; ASP282; ASP616; PHE649; TRP481.                                                                                                               | PHE525; SER523; ARG281; ASN524; MET519; ASP404; TRP516; TRP376. |
| 7a       | 3W37     | ASP232, ARG552, HIS626, ASP469         | LYS506, PHE476, TRP432, PHE601, ASP568, ASP232.                                                                                                       | ASN475, MET470, ALA628, TRP467, ASP357, TRP565, ILE358, SER474. |
| 7b       |          | ASP469, HIS626, ASP232.                | TRP432, PHE601, ASP568, PHE476, ASP232, LYS506.                                                                                                       | ALA628, ASP357, TRP467, ARG552, MET470, SER474, ASN475.         |
| 7c       |          | ASP469, HIS626, ASP232.                | MET470, TRP432, PHE601, ASP568, LYS506, ASP232.                                                                                                       | ALA628, ASP357, TRP467, ARG552, PHE476, SER474, ASN475.         |
| 7a       | 2QV4     | THR163, GLN63, ASP300, HIS299.         | TYR62, LEU162, ALA198, ILE235, HIS201, GLU233.                                                                                                        | TRP59, ARG195, HIS101, HIS305.                                  |
| 7b       |          | GLU233, HIS305.                        | LEU162, ILE235, HIS201, ALA198.                                                                                                                       | LYS200, ARG195, ASP300, TRP58, LEU165, HIS101, THR163.          |
| 7c       |          | GLU233, HIS305.                        | ILE235, HIS201, ALA198.                                                                                                                               | LYS200, ARG195, ASP300, TRP58, LEU162, HIS101.                  |
| 7a       | 5NN8     | ASP616, HIS674.                        | TRP376, PHE649, TRP481, ASP616, PHE525.                                                                                                               | ARG600, ASP404, TRP516, ARG672.                                 |
| 7b       |          | ASP616, ARG600.                        | ASP518, TRP376, PHE649, MET519, ASP282.                                                                                                               | LEU677, SER676, TRP481, LEU405, ASP404, HIS674, ARG281.         |
| 7c       |          | HIS674, ARG600.                        | PHE649, ASP616, TRP481, PHE525.                                                                                                                       | TRP516, ASP404, LEU405, ASP518, TRP376, MET519, ASP282, SER523. |
| 8a       | 3W37     | ASP469, HIS626, ARG552,                | PHE601, ASP568, TRP432, ASP232, PHE476, LYS506.                                                                                                       | ILE358, ASP357, TRP467, MET470, SER474, ASN475.                 |

|    |      |                                                 |                                                                 |                                                                               |
|----|------|-------------------------------------------------|-----------------------------------------------------------------|-------------------------------------------------------------------------------|
|    |      | ASP232                                          |                                                                 |                                                                               |
| 8b |      | HIS626, ARG552, ASP232.                         | TRP432, PHE601, MET470, ASP568, PHE476, ASP232, LYS506.         | ILE358, ASP357, TRP467, ASP469, SER474, ASN475.                               |
| 8c |      | HIS626, ARG552, ASP282.                         | TRP432, ASP568, PHE601, PHE476, ASP282, LYS506.                 | ILE358, ASP357, TRP467, ASP469, SER474, ASN475, MET470, ILE233.               |
| 8a | 2QV4 | -                                               | ILE235, ALA198, LEU162, THR163, TYR62, TRP58, HIS305, TRP59.    | LYS200, HIS299, ASP300, LEU165, HIS101, GLU233, HIS201, ASP197.               |
| 8b |      | HIS201, ALA198, HIS305.                         | LEU162, TYR62, LEU165, TRP59.                                   | TYR151, LYS200, GLU233, HIS101, ARG195, ASP197, ASP300, HIS299, TRP58, GLU60. |
| 8c |      | ALA198.                                         | LEU162, TYR62, LEU165, TRP59.                                   | ILE235, LYS200, HIS201, GLU233, ARG195, GLU60, GLN63.                         |
| 8a | 5NN8 | ASP518, MET519, ARG600, ASP616, ALA555, ASN524. | LEU405, ILE441, TRP481, ASP616, ASP282.                         | ASP404, TRP376, PHE649, PHE525.                                               |
| 8b |      | ALA555, ASP616, ASP518, ARG600.                 | ASP282, TRP376, ASP616, LEU405, TRP481, ILE441, PHE649.         | ASN524, PHE525, LEU677, SER676, ASP404, MET519.                               |
| 8c |      | ASP404, HIS674, ASP282.                         | MET519, TRP481, PHE649, ASP616, PHE525, ALA555, ASP282.         | TRP516, TRP376, ARG600, ASN524.                                               |
| 9a | 3W37 | ALA234, ASP568, ARG552.                         | PHE286, ALA234, ASP568, MET470, TRP432, PHE601, ASP469, TRP329. | TRP565, ASP232, ASP357, ILE358.                                               |
| 9b |      | ASP232, ARG552.                                 | TRP432, PHE601, PHE476, LYS506, MET470, ASP568, ASP232, ILE358. | ASP469, TRP565, SER474, ASN475, TRP329, ASP357.                               |
| 9c |      | ARG552, ASP568, ASP232, ALA234, ILE233.         | ASP469, PHE601, MET470, ASP568, TRP432, ASP232, PHE476.         | ILE358, TRP329, ASP357, TRP565.                                               |
| 9a | 2QV4 | GLU233, GLN63.                                  | ALA198, HIS201, LEU162, LYS200, ILE235, GLU233, TRP59.          | VAL234, LEU165, TYR62, THR163.                                                |
| 9b |      | -                                               | LEU162, TYR62, LEU165, TRP59, HIS201, LYS200, ILE235, ASP197.   | VAL234, ALA198, TRP58, GLU233, ARG195, HIS101.                                |
| 9c |      | GLU233, TRP59, GLN63.                           | HIS201, ILE235, LYS200, LEU162, ALA198, GLU233, TRP59.          | SER199, VAL234, TRP58, THR163, LEU165, TYR62.                                 |
| 9a | 5NN8 | ASP518, ARG600.                                 | TRP376, TRP481, TRP516, HIS674, PHE649, ASP616, ASP282.         | ASP404, MET519, PHE525, ASN524                                                |
| 9b |      | ARG600, ASP518, ASP616.                         | ASP282, PHE525, TRP376, LEU405, TRP481, ILE441, MET519, PHE649. | LEU677, SER676, ASP404, ALA555, SER523, ASN524, LEU650.                       |
| 9c |      | ALA555, ASP282.                                 | ARG527, ALA554, PHE525.                                         | ASN524, ILE526, ARG600, MET519, TRP481.                                       |
